# Supplementary material for: Benzeneseleninic acid used as an oxidizing and deprotecting reagent for the synthesis of multi-cyclic peptides constrained by multiple disulfide bonds and thioether bridges
Source: Royal Society of Chemistry journal article supplement (doi:10.1039/d4qo00589a), 2024-01-01
Supplement: d4qo00589a1.pdf [file d4qo00589a1.pdf]

Electronic Supplementary Information for:

**Benzeneseleninic acid used as an oxidizing and deprotecting reagent for the synthesis of multi-cyclic peptides constrained by multiple disulfide bonds and thioether bridges**

Yueyue Xing,<sup>1</sup> Tianyu Bo,<sup>1</sup> Nan Zhang,<sup>1</sup> Meiqi Wu,<sup>1</sup> Jiawei Wang,<sup>1</sup> Shigang Shen,<sup>1\*</sup>  
Yafang Wang,<sup>1</sup> Changying Song,<sup>1</sup> Tiesheng Shi,<sup>2\*</sup> and Shuying Huo<sup>1\*</sup>

**HPLC elution profiles and mass spectrometric data for the synthesized peptides, 10 supporting tables (Tables S1-S10) and 64 supporting figures (Figures S1-S64) are involved in Electronic Supplementary Information.**

## Peptides

**Linear *a*-conotoxin SI-1:** H-IC(Acm)C(SH)NPAC(Acm)GPKYSC(SH)-NH<sub>2</sub>. The elution protocol for analytical HPLC (C8 column) was set as follows: 10-25% B over 25 min and further to 60% B over 8 min, and then to 90% over 4 min, retention time = 15.8 min; HRMS (ESI) *m/z*: [M+2H<sup>+</sup>]<sup>2+</sup> calcd for C<sub>61</sub>H<sub>100</sub>O<sub>18</sub>N<sub>18</sub>S<sub>4</sub> 750.3173; found 750.3167.

***a*-Conotoxin SI-1:** H-IC(Acm)CNPAC(Acm)GPKYSC-NH<sub>2</sub>, disulfide Cys3/Cys13. The elution protocol for analytical HPLC (C8 column) was set as follows: 10-25% B over 25 min and further to 60% B over 8 min, and then to 90% over 4 min, retention time = 13.9 min; HRMS (ESI) *m/z*: [M+2H<sup>+</sup>]<sup>2+</sup> calcd for C<sub>61</sub>H<sub>98</sub>O<sub>18</sub>N<sub>18</sub>S<sub>4</sub> 749.3095; found 749.3084.

**Linear *a*-conotoxin SI-2** (H-IC(SH)C(Acm)NPAC(SH)GPKYSC(Acm)-NH<sub>2</sub>). The elution protocol for analytical HPLC (C8 column) was set as follows: 10-25% B over 25 min and further to 60% B over 8 min, and then to 90% over 4 min, retention time = 14.2 min.

***a*-Conotoxin SI-2** (H-ICC(Acm)NPACGPKYSC(Acm)-NH<sub>2</sub>, Cys2/Cys7). The elution protocol for analytical HPLC (C8 column) was set as follows: 10-25% B over 25 min and further to 60% B over 8 min, and then to 90% over 4 min, retention time = 14.8 min. HRMS (ESI) *m/z*: [M+H<sup>+</sup>]<sup>+</sup> calcd for C<sub>61</sub>H<sub>97</sub>O<sub>18</sub>N<sub>18</sub>S<sub>4</sub> 1497.6128; found 1497.6128.

***a*-Conotoxin SI:** H-ICCNPACGPKYSC-NH<sub>2</sub>, disulfides Cys2/Cys7, Cys3/Cys13. The elution protocol for analytical HPLC (C8 column) was set as follows: 10-25% B over 25 min and further to 60% B over 8 min, and then to 90% over 4 min, retention time = 17.6 min; HRMS (ESI) *m/z*: [M+2H<sup>+</sup>]<sup>2+</sup> calcd for C<sub>55</sub>H<sub>86</sub>O<sub>16</sub>N<sub>16</sub>S<sub>4</sub>; 677.2636, found 677.2635; [M+H<sup>+</sup>]<sup>+</sup> calcd for C<sub>55</sub>H<sub>85</sub>O<sub>16</sub>N<sub>16</sub>S<sub>4</sub> 1353.5212; found 1353.5230.

**$\alpha$ -Conotoxin SI**, (ICCNPACGPKYSC-NH<sub>2</sub>, two disulfide bonds, Cys2/Cys7, Cys3/Cys13). The elution protocol for analytical HPLC (C18 column) was set as follows: 14-36% B over 25 min, and further to 90% over 5 min; Retention time = 14.4 min; ESI-HRMS  $m/z$ : [M+2H<sup>+</sup>]<sup>2+</sup> calcd. for C<sub>55</sub>H<sub>86</sub>O<sub>16</sub>N<sub>16</sub>S<sub>4</sub> 677.2646; found 677.2628.

**Linear  $\alpha$ -conotoxin SI-3**: H-IC(Acm)C(Acm)NPAC(SH)GPKYSC(SH)-NH<sub>2</sub>. The elution protocol for analytical HPLC (C8 column) was set as follows: 10-25% B over 20 min and further to 60% B over 8 min, and then to 90% over 4 min, retention time = 14.5 min; HRMS (ESI)  $m/z$ : [M+2H<sup>+</sup>]<sup>2+</sup> calcd for C<sub>61</sub>H<sub>100</sub>O<sub>18</sub>N<sub>18</sub>S<sub>4</sub> 750.3173; found 750.3167.

**$\alpha$ -Conotoxin SI-3**: H-IC(Acm)C(Acm)NPACGPKYSC-NH<sub>2</sub>, disulfide Cys7/Cys13. The elution protocol for analytical HPLC (C8 column) was set as follows: 10-25% B over 20 min and further to 60% B over 8 min, and then to 90% over 4 min, retention time = 13.2 min; HRMS (ESI)  $m/z$ : [M+2H<sup>+</sup>]<sup>2+</sup> calcd for C<sub>61</sub>H<sub>98</sub>O<sub>18</sub>N<sub>18</sub>S<sub>4</sub> 749.3095; found 749.3087.

**Bead  $\alpha$ -conotoxin SI**: H-ICCNPACGPKYSC-NH<sub>2</sub>, disulfides Cys2/Cys3, Cys7/Cys13. The elution protocol for analytical HPLC (C8 column) was set as follows: 10-25% B over 20 min and further to 60% B over 8 min, and then to 90% over 4 min, retention time = 15.4 min; HRMS (ESI)  $m/z$ : [M+2H<sup>+</sup>]<sup>2+</sup> calcd for C<sub>55</sub>H<sub>86</sub>O<sub>16</sub>N<sub>16</sub>S<sub>4</sub>; 677.2636, found 677.2639.

**Linear  $\alpha$ -conotoxin SI-4**: H-IC(Acm)C(SH)NPAC(SH)GPKYSC(Acm)-NH<sub>2</sub>. The elution protocol for analytical HPLC (C8 column) was set as follows: 10-25% B over 20 min and further to 60% B over 8 min, and then to 90% over 4 min, retention time = 15.4 min; HRMS (ESI)  $m/z$ : [M+2H<sup>+</sup>]<sup>2+</sup> calcd for C<sub>61</sub>H<sub>100</sub>O<sub>18</sub>N<sub>18</sub>S<sub>4</sub> 750.3173; found 750.31707.

***α*-Conotoxin SI-4:** H-IC(Acm)CNPACGPKYSC(Acm)-NH<sub>2</sub>, disulfide Cys3/Cys7.

The elution protocol for analytical HPLC (C8 column) was set as follows: 10-25% B over 20 min and further to 60% B over 8 min, and then to 90% over 4 min, retention time = 14.1 min; HRMS (ESI)  $m/z$ : [M+2H<sup>+</sup>]<sup>2+</sup> calcd for C<sub>61</sub>H<sub>98</sub>O<sub>18</sub>N<sub>18</sub>S<sub>4</sub> 749.3095; found 749.3089..

**Ribbon *α*-conotoxin SI:** H-ICCNPACGPKYSC-NH<sub>2</sub>, disulfides Cys2/Cys13,

Cys3/Cys7. The elution protocol for analytical HPLC (C8 column) was set as follows: 10-25% B over 20 min and further to 60% B over 8 min, and then to 90% over 4 min, retention time = 15.9 min; HRMS (ESI)  $m/z$ : [M+2H<sup>+</sup>]<sup>2+</sup> calcd for C<sub>55</sub>H<sub>86</sub>O<sub>16</sub>N<sub>16</sub>S<sub>4</sub>; 677.2636, found 677.2640.

**Linear apamin** (H-C(Acm)NC(SH)KAPETALC(Acm)ARRC(SH)QQH-NH<sub>2</sub>). The elution protocol for analytical HPLC (C8 column) was set as follows: 10-50% B over 25 min, and then to 90% over 5 min, retention time = 11.3 min.

**Apamin-1** (H-C(Acm)NCKAPETALC(Acm)ARRCQQH-NH<sub>2</sub>, disulfide Cys3/Cys15). The elution protocol for analytical HPLC (C8 column) was set as follows: 10-50% B over 25 min, and then to 90% over 5 min, retention time = 11.9 min. HRMS (ESI)  $m/z$ : [M+2H<sup>+</sup>]<sup>2+</sup> calcd for C<sub>85</sub>H<sub>145</sub>O<sub>26</sub>N<sub>33</sub>S<sub>4</sub>; 1086.4974, found 1086.4972.

**Apamin** (H-CNCKAPETALCARRCQQH-NH<sub>2</sub>, disulfides Cys1/Cys11 and Cys3/Cys15). The elution protocol for analytical HPLC (C8 column) was set as follows: 10-50% B over 25 min, and then to 90% over 5 min, retention time = 10.1 min. HRMS (ESI)  $m/z$ : [M+2H<sup>+</sup>]<sup>2+</sup> calcd for C<sub>79</sub>H<sub>133</sub>O<sub>24</sub>N<sub>31</sub>S<sub>4</sub>; 1014.4524, found 1014.4508.

**Linear *α*-conotoxin IMI:** H-GC(SH)C(Acm)SDPRC(SH)AWRC(Acm)-NH<sub>2</sub>. The elution protocol for analytical HPLC (C8 column) was set as follows: 10-60% B over

25 min and further to 90% B over 5 min, retention time = 13.1 min.

**$\alpha$ -conotoxin IMI-1:** H-GCC(Acm)SDPRCAWRC(Acm)-NH<sub>2</sub>, disulfide Cys2/Cys8.

The elution protocol for analytical HPLC (C8 column) was set as follows: 10-60% B over 25 min and further to 90% B over 5 min, retention time = 11.9 min; HRMS (ESI)  $m/z$ : [M+2H<sup>+</sup>]<sup>2+</sup> calcd for C<sub>58</sub>H<sub>92</sub>O<sub>17</sub>N<sub>22</sub>S<sub>4</sub> 748.2947; found. 748.2939.

**$\alpha$ -conotoxin IMI:** H-GCCSDPRCAWRC-NH<sub>2</sub>, disulfides Cys2/Cys8, Cys3/Cys12.

The elution protocol for analytical HPLC (C8 column) was set as follows: 10-60% B over 25 min and further to 90% B over 5 min, retention time = 12.1min; HRMS (ESI)  $m/z$ : [M+2H<sup>+</sup>]<sup>2+</sup> calcd For C<sub>52</sub>H<sub>80</sub>O<sub>15</sub>N<sub>20</sub>S<sub>4</sub> 676.2498; found 676.2491.

**Linear M-peptide,** (H-GC(SH)C(Acm)SDPFC(SH)NMNNPDYC(Acm)-NH<sub>2</sub>). The elution protocol for analytical HPLC (C8 column) was set as follows: 10-23% B over 10 min, further to 48% within 12 min, and then to 90% over 10 min, retention time = 17.1 min.

**M-peptide-1,** (H-GCC(Acm)SDPFCNMNNPDYC(Acm)-NH<sub>2</sub>, disulfide Cys2/Cys8).

The elution protocol for analytical HPLC (C8 column) was set as follows: 10-23% B over 10 min, further to 48% within 12 min, and then to 90% over 10 min, retention time = 17.6 min. HRMS (ESI)  $m/z$ : [M+2H<sup>+</sup>]<sup>2+</sup> calcd for C<sub>76</sub>H<sub>110</sub>O<sub>27</sub>N<sub>22</sub>S<sub>5</sub>; 961.3257, found 961.3248.

**M-peptide,** (GCCSDPFCNMNNPDYC-NH<sub>2</sub>, disulfides Cys2/Cys8, Cys3/Cys16).

The elution protocol for analytical HPLC (C8 column) was set as follows: 10-23% B over 10 min, further to 48% within 12 min, and then to 90% over 10 min, retention time = 17.8 min. HRMS (ESI)  $m/z$ : [M+2H<sup>+</sup>]<sup>2+</sup> calcd for C<sub>70</sub>H<sub>98</sub>O<sub>25</sub>N<sub>20</sub>S<sub>5</sub> 889.2808; found 889.2798.

**M(O)-peptide,** (GCCSDPFCNM(O)NNPDYC-NH<sub>2</sub>, disulfides Cys2/Cys8,

Cys3/Cys16). The elution protocol for analytical HPLC (C8 column) was set as

follows: 10-23% B over 10 min, further to 48% within 12 min, and then to 90% over 10 min, retention time = 14.5 min. HRMS (ESI)  $m/z$ :  $[M+2H^+]^{2+}$  calcd for  $C_{70}H_{98}O_{26}N_{20}S_5$  897.2782; found 897.2779.

**XCBP-1**, The elution protocol for analytical HPLC (C8 column) was set as follows: 10-25% B over 20 min, further to 60% within 8 min, and then to 90% over 4 min, retention time = 25.6 min. HRMS (ESI)  $m/z$ :  $[M+2H^+]^{2+}$  calcd for  $C_{71}H_{102}O_{16}N_{16}S_4$  781.3271; found 781.3262.

**XCBP-2**, The elution protocol for analytical HPLC (C8 column) was set as follows: 10-25% B over 20 min, further to 60% within 8 min, and then to 90% over 4 min, retention time = 26.9 min. HRMS (ESI)  $m/z$ :  $[M+2H^+]^{2+}$  calcd for  $C_{71}H_{102}O_{16}N_{16}S_4$  781.3271; found 781.3261.

**XCBP-3**, The elution protocol for analytical HPLC (C8 column) was set as follows: 10-25% B over 20 min, further to 60% within 8 min, and then to 90% over 4 min, retention time = 27.0 min. HRMS (ESI)  $m/z$ :  $[M+2H^+]^{2+}$  calcd for  $C_{71}H_{102}O_{16}N_{16}S_4$  781.3271; found 781.3258.

**XCBP-4**, The elution protocol for analytical HPLC (C8 column) was set as follows: 10-25% B over 20 min, further to 60% within 8 min, and then to 90% over 4 min, retention time = 27.2 min. HRMS (ESI)  $m/z$ :  $[M+2H^+]^{2+}$  calcd for  $C_{71}H_{102}O_{16}N_{16}S_4$  781.3271; found 781.3261.

**XCBP-5**, The elution protocol for analytical HPLC (C8 column) was set as follows: 10-25% B over 20 min, further to 60% within 8 min, and then to 90% over 4 min, retention time = 27.0 min. HRMS (ESI)  $m/z$ :  $[M+2H^+]^{2+}$  calcd for  $C_{71}H_{102}O_{16}N_{16}S_4$  781.3271; found 781.3261.

**Reduced  $\alpha$ -conotoxin SI**, (H-IC(SH)C(SH)NPAC(SH)GPKYSC(SH)-NH<sub>2</sub>). The elution protocol for analytical HPLC (C18 column) was set as follows: 14-36% B

over 25 min, and further to 90% over 5 min; Retention time = 13.5 min.

**Isomer of  $\alpha$ -conotoxin SI**, (H-ICCNPACGPKYSC-NH<sub>2</sub>, two disulfide bonds, Cys2/Cys3, Cys7/Cys13). The elution protocol for analytical HPLC (C18 column) was set as follows: 14-36% B over 25 min, and further to 90% over 5 min; Retention time = 12.5 min.

**Isomer of  $\alpha$ -conotoxin SI**, (H-ICCNPACGPKYSC-NH<sub>2</sub>, two disulfide bonds, Cys2/Cys13, Cys3/Cys7). The elution protocol for analytical HPLC (C18 column) was set as follows: 14-36% B over 25 min, and further to 90% over 5 min; Retention time = 12.9 min.

**Reduced conotoxin mr3e** (H-VC(SH)C(SH)PFGGC(SH)HELC(SH)YC(SH)C(SH)-D-NH<sub>2</sub>). The elution protocol for analytical HPLC (C8 column) was set as follows: 10-30% B over 20 min and further to 60% B over 5 min, and then to 90% over 5 min, retention time = 25.9 min. HRMS (ESI)  $m/z$ :  $[M+2H^+]^{2+}$  calcd for C<sub>71</sub>H<sub>105</sub>O<sub>21</sub>N<sub>19</sub>S<sub>6</sub>; 875.8028, found 875.8014.

**Conotoxin mr3e** (H-VCCPFGGCHELCYCCD-NH<sub>2</sub> Cys2/Cys14, Cys3/Cys12, Cys8/Cys15). The elution protocol for analytical HPLC (C8 column) was set as follows: 10-30% B over 20 min and further to 60% B over 5 min, and then to 90% over 5 min, retention time = 20.5 min. HRMS (ESI)  $m/z$ :  $[M+2H^+]^{2+}$  calcd for C<sub>71</sub>H<sub>99</sub>O<sub>21</sub>N<sub>19</sub>S<sub>6</sub>; 872.7794, found 872.7775.

**Isomer of conotoxin mr3e** (H-VCCPFGGCHELCYCCD-NH<sub>2</sub>, three disulfide bonds). The elution protocol for analytical HPLC (C8 column) was set as follows: 10-30% B over 20 min and further to 60% B over 5 min, and then to 90% over 5 min, retention time = 21.8 min. HRMS (ESI)  $m/z$ :  $[M+2H^+]^{2+}$  calcd for C<sub>71</sub>H<sub>99</sub>O<sub>21</sub>N<sub>19</sub>S<sub>6</sub>; 872.7794, found 872.7776.

**Reduced enterotoxin STp**, (H-C(SH)C(SH)ELC(SH)C(SH)NPAC(SH)AGC(SH)Y-

OH). The elution protocol for analytical HPLC (C8 column) was set as follows: 10-23% B over 10 min and further to 48% B over 12 min, and then to 90% over 10 min, retention time = 18.2 min. HRMS (ESI)  $m/z$ :  $[M+H]^+$  calcd for  $C_{55}H_{86}N_{15}O_{19}S_6$ ; 1452.4549, found 1452.4517.

**Oxidized enterotoxin STp**, (H-CCELCCNPACAGCY-OH, disulfides Cys1/Cys6, Cys2/Cys10, Cys5/Cys13). The elution protocol for analytical HPLC (C8 column) was set as follows: 10-23% B over 10 min and further to 48% B over 12 min, and then to 90% over 10 min, retention time = 17.3 min. HRMS (ESI)  $m/z$ :  $[M-H]^+$  calcd for  $C_{55}H_{78}N_{15}O_{19}S_6$ ; 1444.3923, found 1444.3959.

**Reduced  $\mu$ -conotoxin KIIIA**, (H-C(SH)C(SH)NC(SH)SSKWC(SH)RDHSRC(SH)C(SH)-NH<sub>2</sub>). The elution protocol for analytical HPLC (C8 column) was set as follows: 10-20% B over 25 min, and then to 90% over 10 min, retention time = 20.6 min.

**KIIIA-T**, (H-CCNCSSKWCRDHSRCC-NH<sub>2</sub>, Cys1/Cys15, Cys2/Cys9, Cys4/Cys16). The elution protocol for analytical HPLC (C8 column) was set as follows: 10-20% B over 25 min, and then to 90% over 10 min, retention time = 9.6 min. HRMS (ESI)  $m/z$ :  $[M+3H]^3+$  calcd for  $C_{70}H_{109}N_{28}O_{22}S_6$ ; 628.5531, found 628.5512.

**Reduced linaclootide**, (H-C(SH)C(SH)EYC(SH)C(SH)NPAC(SH)TGC(SH)Y-NH<sub>2</sub>). The elution protocol for analytical HPLC (C18 column) was set as follows: 10-30% B over 10 min, and further to 60% over 15 min, finally to 90% over 5; Retention time = 15.2 min.

**Linaclootide**, (H-CCEYCCNPACTGCY-NH<sub>2</sub>, three disulfide bonds, Cys2/Cys10, Cys5/Cys13 and Cys1/Cys6). The elution protocol for analytical HPLC (C18 column) was set as follows: 10-30% B over 10 min, and further to 60% over 15 min, finally to 90% over 5; Retention time = 15.0 min; ESI-HRMS  $m/z$ :  $[M+2H]^2+$  calcd. for  $C_{59}H_{81}N_{15}O_{21}S_6$  763.7028, found 763.7007.



**Reduced ziconotide**, (H-C(SH)KGKGAKC(SH)SRLMYDC(SH)C(SH)TGSC-(SH)RSGKC(SH)-NH<sub>2</sub>). The elution protocol for analytical HPLC (C18 column) was set as follows: 10-30% B over 20 min, and further to 35% over 10 min, finally to 90% over 7 min; Retention time = 18.8 min.

**Ziconotide**, (H-CKGKGAKCSRLMYDCCTGSCRSKGC-NH<sub>2</sub>, three disulfide bonds, Cys1/Cys16, Cys8/Cys20, Cys15/Cys25). The elution protocol for analytical HPLC (C18 column) was set as follows: 10-30% B over 20 min, and further to 35% over 10 min, finally to 90% over 7 min; Retention time = 15.8 min. ESI-HRMS *m/z*: [M+3H<sup>+</sup>]<sup>3+</sup> calcd. for C<sub>102</sub>H<sub>175</sub>N<sub>36</sub>O<sub>32</sub>S<sub>7</sub> 880.3748, found 880.3728.

**Table S1.** Linear *a*-conotoxin SI-1 (0.5 mM) reaction with BSA at room temperature.

| Entry           | Solvent                      | Amount of BSA (Equiv.) <sup>a</sup> | Time (min) | Conversion <sup>b</sup> (%) | Yield <sup>c</sup> (%) |
|-----------------|------------------------------|-------------------------------------|------------|-----------------------------|------------------------|
| i               | pH = 7.0<br>phosphate buffer | 0.3                                 | 50         | 92                          | 78                     |
| ii              | pH = 7.0<br>phosphate buffer | 0.5                                 | 20         | 100                         | 89                     |
| iii             | pH = 7.0<br>phosphate buffer | 1.0                                 | 20         | 80                          | 85                     |
| iv              | H <sub>2</sub> O             | 0.5                                 | 50         | 65                          | 75                     |
| v               | pH = 7.0 Tris<br>buffer      | 0.5                                 | 20         | 87                          | 86                     |
| vi <sup>d</sup> | pH = 7.0<br>phosphate buffer | 0.5                                 | 20         | 88                          | 84                     |
| vii             | pH = 6.0<br>phosphate buffer | 0.5                                 | 120        | 75                          | 60                     |
| viii            | pH = 8.0<br>phosphate buffer | 0.5                                 | 20         | 80                          | 85                     |

<sup>a</sup> Equivalent of BSA to peptide; <sup>b</sup> Conversion was calculated by the equation: Conversion = (peak area of *a*-conotoxin SI-1)/(peak area of linear *a*-conotoxin SI-1) × 100%; <sup>c</sup> The yield was calculated by the peak areas of *a*-conotoxin SI-1; <sup>d</sup> 1.0 mM of linear *a*-conotoxin SI-1.

**Table S2.** *a*-Conotoxin SI-1 (0.5 mM) reaction with BSA at room temperature.

| Entry | Solvent                  | Amount of BSA (Equiv.) <sup>a</sup> | Time (min) | Conversion <sup>b</sup> (%) | Yield <sup>c</sup> (%) |
|-------|--------------------------|-------------------------------------|------------|-----------------------------|------------------------|
| i     | 1.0 M TFA,<br>0.5 M NaBr | 1.0                                 | 15         | 93                          | 85                     |
| ii    | 0.8 M TFA,<br>0.5 M NaBr | 0.5                                 | 20         | 75                          | 78                     |
| iii   | 0.8 M TFA,<br>0.5 M NaBr | 1.0                                 | 20         | 100                         | 87                     |
| iv    | 0.8 M TFA,<br>0.5 M NaBr | 1.5                                 | 20         | 87                          | 87                     |
| v     | 0.5 M TFA,<br>0.5 M NaBr | 1.0                                 | 60         | 45                          | 67                     |
| vi    | 0.8 M TFA,<br>0.3 M NaBr | 1.0                                 | 50         | 81                          | 77                     |

<sup>a</sup> Equivalent of BSA to peptide; <sup>b</sup> Conversion was calculated by the equation: Conversion = (peak area of *a*-conotoxin SI)/(peak area of linear *a*-conotoxin SI-1) × 100%; <sup>c</sup> The yield was calculated by the peak areas of *a*-conotoxin SI.

**Table S3.** Oxy(Acm) (0.25 mM) reaction with BSA (0.125 mM) in various solvents at room temperature.

| Entry | Solvents                 | Time (min) | Conversion <sup>a</sup> (%) | Yield <sup>b</sup> (%) |
|-------|--------------------------|------------|-----------------------------|------------------------|
| i     | TFA                      | 60         | 79                          | 78                     |
| ii    | 1.0 M TFA                | 60         | -                           | -                      |
| iii   | 2.0 M TFA                | 60         | -                           | -                      |
| iv    | 1.0 M HCl                | 60         | -                           | -                      |
| v     | 1.0 M HBr                | 10         | 74                          | 84                     |
| vi    | 0.8 M HBr                | 10         | 78                          | 93                     |
| vii   | 0.5 M HBr                | 60         | 70                          | 92                     |
| viii  | 0.1 M HBr                | 60         | 3                           | 2                      |
| ix    | 1.0 M NaBr               | 5 h        | -                           | -                      |
| x     | 0.1 M NaBr,<br>1.0 M TFA | 60         | 10                          | 12                     |
| xi    | 0.5 M NaBr,<br>1.0 M TFA | 60         | 75                          | 92                     |
| xii   | 1.0 M NaBr,<br>1.0 M TFA | 40         | 71                          | 93                     |
| xiii  | 2.0 M NaBr,<br>1.0 M TFA | 10         | 78                          | 93                     |
| xiv   | 1.0 M NaBr,<br>0.5 M TFA | 60         | 80                          | 92                     |
| xv    | 1.0 M NaBr,<br>2.0 M TFA | 10         | 74                          | 90                     |

|     |                          |     |    |    |
|-----|--------------------------|-----|----|----|
| xvi | 0.5 M NaBr,<br>0.5 M TFA | 3 h | 75 | 85 |
|-----|--------------------------|-----|----|----|

---

<sup>a</sup> Conversion was calculated by the equation: Conversion = (peak area of generated oxytocin)/(peak area of oxy(Acm)) × 100%; “-” : no reaction occurred.

**Table S4.** Reactions of reduced *a*-conotoxin SI (0.2 mM) with BSA at room temperature.

| Entry             | Solvent                 | Amount of BSA (Equiv.) <sup>a</sup> | Time | Yield <sup>b</sup> (%) | Conversion <sup>c</sup> (%) |
|-------------------|-------------------------|-------------------------------------|------|------------------------|-----------------------------|
| i                 | pH 5.0 Phosphate buffer | 1                                   | 50   | 35                     | 15                          |
| ii                | pH 6.0 Phosphate buffer | 1                                   | 30   | 70                     | 62                          |
| iii               |                         | 0.5                                 | 30   | 70                     | 49                          |
| iv                | pH 7.0 Phosphate buffer | 1                                   | 30   | 90                     | 110                         |
| v                 |                         | 1.5                                 | 45   | 86                     | 98                          |
| vi                | pH 8.0 Phosphate buffer | 1                                   | 45   | 73                     | 88                          |
| vii <sup>d</sup>  | pH 7.0 Phosphate buffer | 1                                   | 50   | 65                     | 77                          |
| viii <sup>e</sup> | pH 7.0 Phosphate buffer | 1                                   | 50   | 84                     | 85                          |
| ix <sup>f</sup>   | pH 7.0 Phosphate buffer | 1                                   | 50   | 82                     | 72                          |
| x                 | 10 mM HCl               | 0.5                                 | 60   | -                      | -                           |
| xi                | pH 7.0 Gn.HCl           | 1                                   | 60   | 32                     | 33                          |

<sup>a</sup> Equivalent of BSA to peptide; <sup>b</sup> Yield was calculated by the peak area of *a*-conotoxin SI and its isomers; <sup>c</sup> Conversion was calculated by the equation: Conversion = (peak area of *a*-conotoxin SI)/(peak area of reduced *a*-conotoxin SI) × 100%; <sup>d</sup> Reaction of 0.1 mM *a*-conotoxin SI with 0.1 mM BSA; <sup>e</sup> Reaction of 0.5 mM *a*-conotoxin SI with 0.5 mM BSA; <sup>f</sup> Reaction of 1.0 mM *a*-conotoxin SI with 1.0 mM BSA; “-” : No *a*-conotoxin SI was generated.

**Table S5.** The reaction of reduced conotoxin mr3e (0.2 mM) with BSA in pH 7.0 phosphate buffer solution at 25 °C.

| Entry | Amount of BSA (equiv. <sup>a</sup> ) | Time (min) | Yield <sup>b</sup> (%) | Conversion <sup>c</sup> (%) |
|-------|--------------------------------------|------------|------------------------|-----------------------------|
| i     | 0.2                                  | 240        | 83                     | 129                         |
| ii    | 0.3                                  | 150        | 83                     | 128                         |
| iii   | 0.5                                  | 45         | 81                     | 115                         |
| iv    | 0.5                                  | 150        | 83                     | 140                         |
| v     | 1.0                                  | 45         | 83                     | 142                         |
| vi    | 1.0                                  | 150        | 82                     | 141                         |
| vii   | 1.5                                  | 45         | 69                     | 95                          |
| viii  | 1.5                                  | 150        | 70                     | 104                         |

<sup>a</sup> Equivalent of BSA to peptide; <sup>b</sup> Yield of conotoxin mr3e was calculated by the peak areas of the generated conotoxin mr3e and its isomer; <sup>c</sup> Conversion was calculated by the equation: Conversion = (peak area of conotoxin mr3e)/(peak area of reduced conotoxin mr3e) × 100%.

**Table. S6** Oxidation folding of reduced conotoxin mr3e (0.2 mM) by GSH/GSSG in pH 8.0 Tris buffer solution at 25 °C.

| Entry | Reduced conotoxin<br>mr3e : GSSG :<br>GSH | Time (h) | Yield <sup>a</sup> (%) | Conversion <sup>b</sup> (%) |
|-------|-------------------------------------------|----------|------------------------|-----------------------------|
| i     | 1:10:100                                  | 1        | 82%                    | 114                         |
| ii    |                                           | 2        | 83%                    | 128                         |
| iii   |                                           | 4        | 84%                    | 130                         |
| iv    |                                           | 23       | 84%                    | 130                         |
| v     | 1:10:10                                   | 1        | 84%                    | 164                         |
| vi    |                                           | 2        | 84%                    | 173                         |
| vii   |                                           | 3        | 86%                    | 172                         |
| viii  |                                           | 19       | 86%                    | 175                         |

<sup>a</sup> Yield of conotoxin mr3e was calculated by the peak areas of the generated conotoxin mr3e and its isomer; <sup>b</sup> Conversion was calculated by the equation: Conversion = (peak area of conotoxin mr3e)/(peak area of reduced conotoxin mr3e) × 100%.



**Table S7.** 0.2 mM reduced STp reaction with BSA in pH 7.5 phosphate buffer solution at 25 °C.

| Entry | Amount of BSA (equiv.) | Time (min) | Yield <sup>a</sup> (%) | Conversion <sup>b</sup> (%) |
|-------|------------------------|------------|------------------------|-----------------------------|
| i     |                        | 45         | 94                     | 63                          |
| ii    | 0.5                    | 3 h        | 91                     | 74                          |
| iii   |                        | 6 h        | 91                     | 75                          |
| iv    | 1                      | 45         | 96                     | 85                          |
| v     |                        | 90         | 94                     | 85                          |
| vi    | 1.5                    | 45         | 9                      | 4.3                         |

<sup>a</sup> Yield was calculated by the peak area of oxidized STp; <sup>b</sup> Conversion was calculated by the equation: Conversion = (peak area of oxidized STp)/(peak area of reduced STp) × 100%.

**Table S8.** 0.4 mM reduced  $\mu$ -conotoxin KIIIA reaction with BSA in pH 7.0 phosphate buffer solution at 25 °C.

| Entry           | Amount of BSA (equiv.) | Time (min) | Yield <sup>a</sup> (%) | Conversion <sup>b</sup> (%) |
|-----------------|------------------------|------------|------------------------|-----------------------------|
| i               |                        | 45         | 78                     | 53                          |
| ii              | 0.5                    | 2.5 h      | 80                     | 88                          |
| iii             |                        | 9 h        | 80                     | 88                          |
| iv              |                        | 45         | 82                     | 93                          |
| v               | 1                      | 1.5 h      | 82                     | 97                          |
| vi              |                        | 2.5 h      | 82                     | 105                         |
| vii             | 1.5                    | 45         | 80                     | 96                          |
| viii            |                        | 1.5        | 80                     | 105                         |
| ix <sup>c</sup> | 1                      | 1.5        | 80                     | 105                         |

<sup>a</sup> Yield was calculated by the peak areas of the generated  $\mu$ -conotoxin KIIIA and its isomer; <sup>b</sup> Conversion was calculated by the equation: Conversion = (peak area of reduced  $\mu$ -conotoxin KIIIA)/(peak area of  $\mu$ -conotoxin KIIIA)  $\times$  100%; <sup>c</sup> [reduced  $\mu$ -conotoxin KIIIA] = 0.2 mM.

**Table S9.** The reaction of reduced linaclotide (0.2 mM) with BSA at 25 °C.

| Entry | Solvent                    | Amount of BSA<br>(Equiv.) <sup>a</sup> | Time | Yield <sup>b</sup> (%) | Conversion <sup>c</sup> (%) |
|-------|----------------------------|----------------------------------------|------|------------------------|-----------------------------|
| i     |                            | 0.8                                    | 50   | 60                     | 34                          |
| ii    | PH 7.0<br>phosphate buffer | 1                                      | 50   | 88                     | 91                          |
| iii   |                            | 1.5                                    | 50   | 28                     | 21                          |
| iv    | PH 8.0<br>phosphate buffer | 1                                      | 50   | 40                     | 33                          |
| v     | PH 7.00<br>6MGn.HCl        | 1                                      | 50   | -                      | -                           |

<sup>a</sup> Equivalent of BSA to peptide; <sup>b</sup> Yield was calculated by the peak area of the generated linaclotide; <sup>c</sup> Conversion was calculated by the equation: conversion = (peak area of generated linaclotide/ peak area of reduced linaclotide) × 100%; “-” : no linaclotide was generated.

**Table S10.** The reaction of reduced ziconotide (0.2 mM) with BSA (0.2 mM) for 60 min at 25 °C.

| Entry            | Solvent                                            | Yield <sup>a</sup> (%) | Conversion <sup>b</sup> (%) |
|------------------|----------------------------------------------------|------------------------|-----------------------------|
| i                | H <sub>2</sub> O                                   | -                      | -                           |
| ii               | pH 7.0 CH <sub>3</sub> COONH <sub>4</sub> solution | -                      | -                           |
| iii              | Tris pH 7.0                                        | 61                     | 43                          |
| iv <sup>c</sup>  | Phosphate buffer                                   | 88                     | 65                          |
| v <sup>d</sup>   | Phosphate buffer                                   | 80                     | 53                          |
| vi <sup>e</sup>  | Phosphate buffer                                   | 95                     | 140                         |
| vii <sup>f</sup> | Phosphate buffer                                   | 86                     | 81                          |

<sup>a</sup> Yield was calculated by the equation: Yield = (peak area of generated linaclotide/ peak areas of all peptide contents) × 100%; <sup>b</sup> Conversion was calculated by the equation: conversion = (peak area of generated linaclotide/ peak area of reduced linaclotide) × 100%; <sup>c</sup> Ziconotide in H<sub>2</sub>O (0.4 mM, 0.4 mL) mixed with BSA in pH 7.0 phosphate buffer (0.4 mM, 0.4 mL); <sup>d</sup> Ziconotide in H<sub>2</sub>O (0.2 mM, 0.4 mL) mixed with BSA in pH 7.0 phosphate buffer (0.2 mM, 0.4 mL); <sup>e</sup> Ziconotide in H<sub>2</sub>O (0.4 mM, 0.4 mL) mixed with 0.4 mL pH 7.0 phosphate buffer, followed by treatment with BSA in 7.0 phosphate buffer (4.0 mM, 40  $\mu$ L); <sup>f</sup> Ziconotide in H<sub>2</sub>O (0.2 mM, 0.4 mL) mixed with 0.4 mL pH 7.0 phosphate buffer, followed by treatment with BSA in 7.0 phosphate buffer (4.0 mM, 20  $\mu$ L); “-” : No linaclotide was generated.

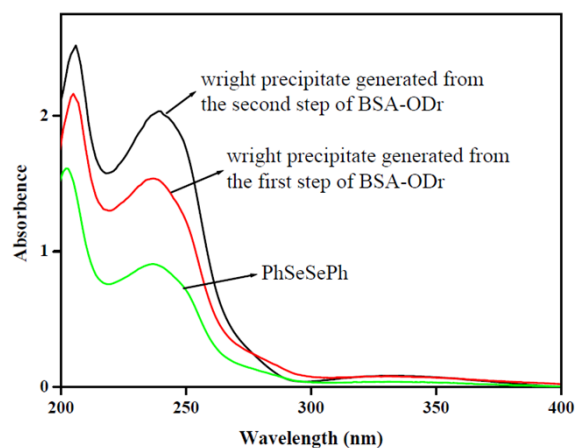

**Fig. S1** The precipitate was characterized as diphenyl diselenide by use of UV-Vis spectrometer.

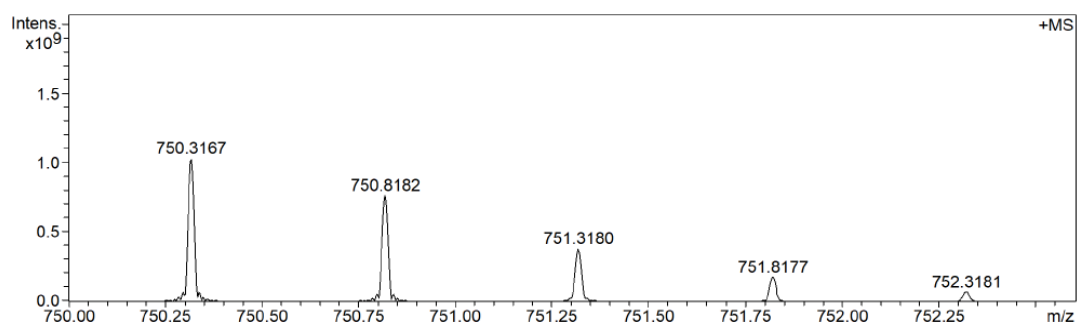

**Fig. S2** Mass spectrum of linear  $\alpha$ -conotoxin SI-1.

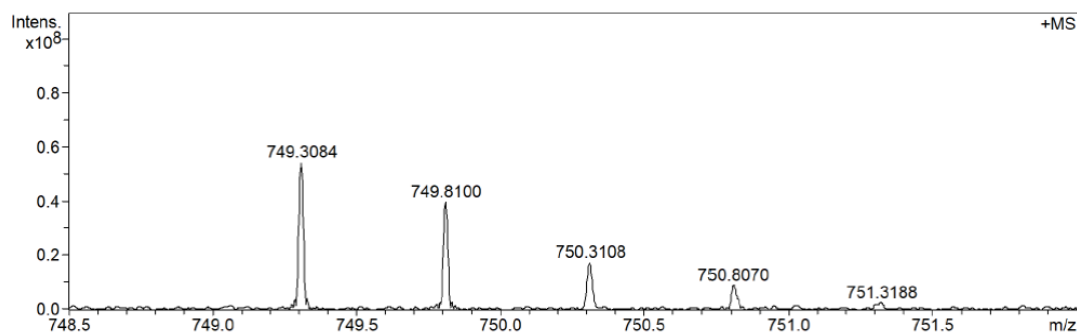

**Fig. S3** Mass spectrum of  $\alpha$ -conotoxin SI-1.

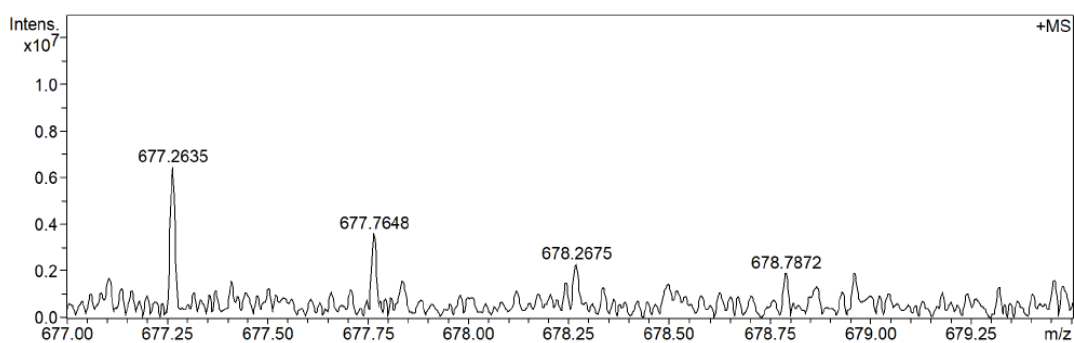

**Fig. S4** Mass spectrum of *a*-conotoxin SI.

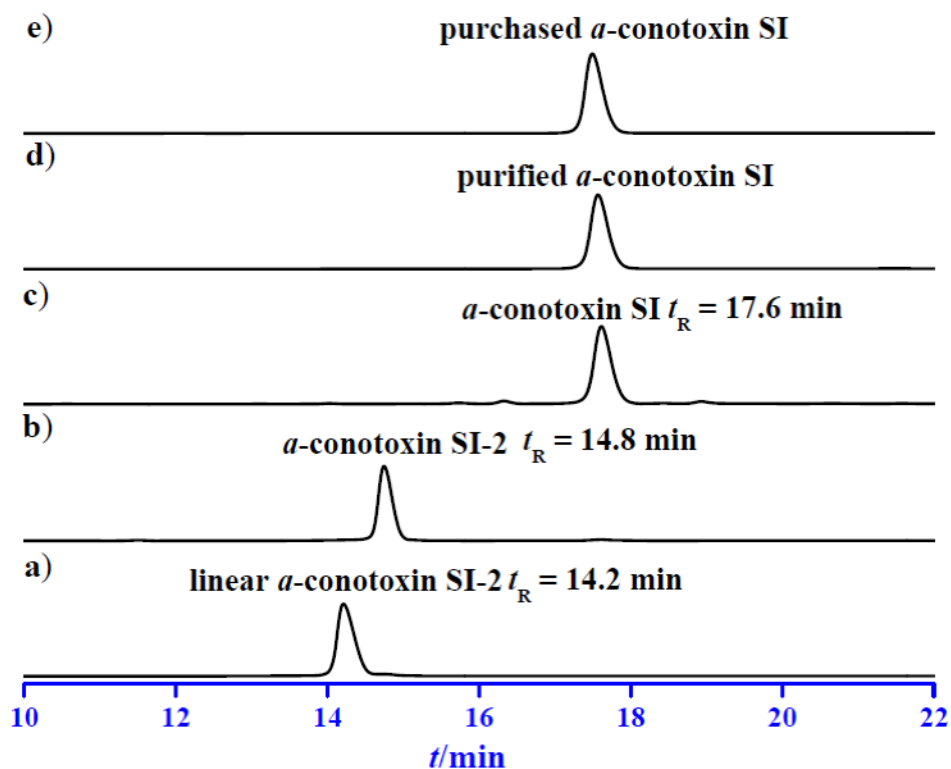

**Fig. S5** HPLC chromatograms of a) linear *a*-conotoxin SI-2; b) the generated *a*-conotoxin SI-2 from the reaction of linear *a*-conotoxin SI-2 with BSA in pH 7.0 phosphate buffer; c) the generated *a*-conotoxin SI from the reaction of *a*-conotoxin SI-2 with BSA in 0.8 M TFA and 0.5 M HBr; d) the purified *a*-conotoxin SI; e) the purchased *a*-conotoxin SI.

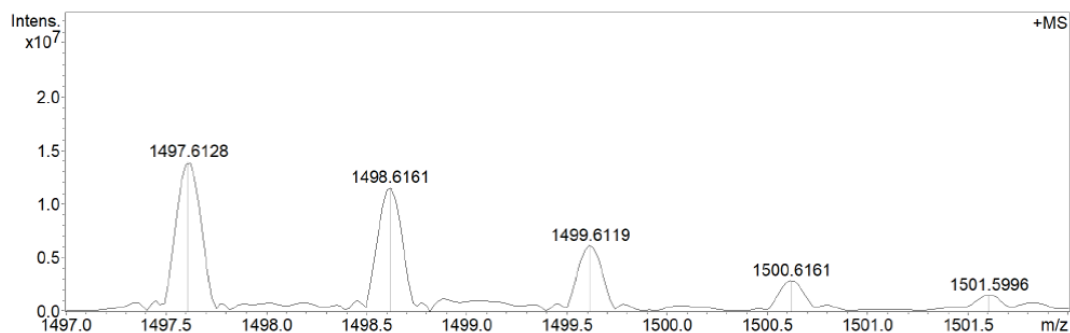

**Fig. S6** Mass spectrum of *a*-conotoxin SI-2.

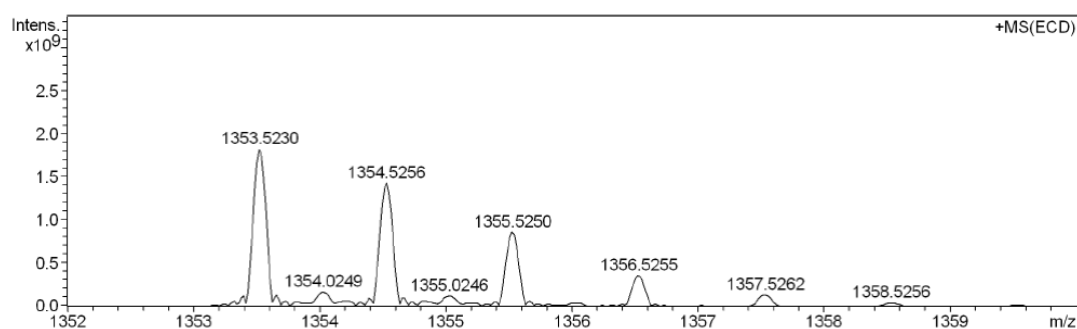

**Fig. S7** Mass spectrum of *a*-conotoxin SI.

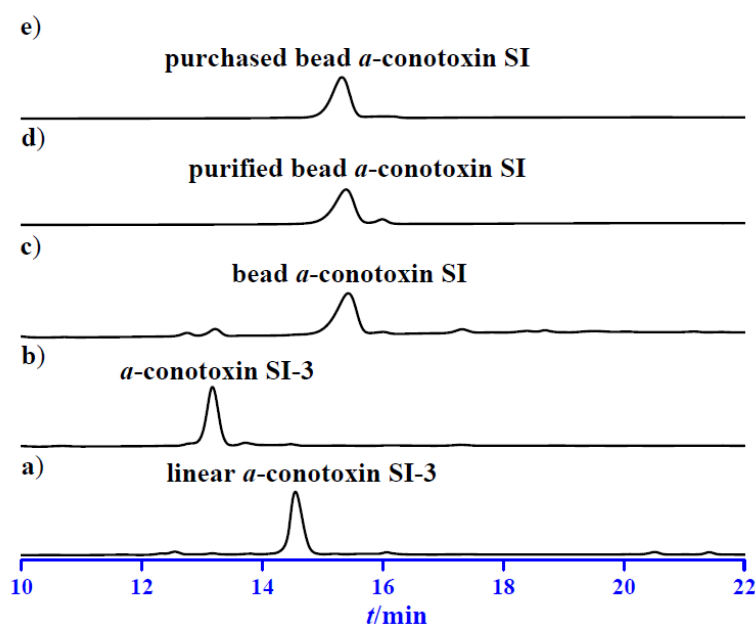

**Fig. S8** HPLC chromatograms of a) linear *a*-conotoxin SI-3; b) the generated *a*-conotoxin SI-3 from the reaction of linear *a*-conotoxin SI-3 with BSA in pH 7.0 phosphate buffer; c) the generated bead *a*-conotoxin SI from the reaction of *a*-conotoxin SI-3 with BSA in 0.8 M TFA and 0.5 M HBr; d) the purified bead *a*-conotoxin SI; e) the purchased bead *a*-conotoxin SI.

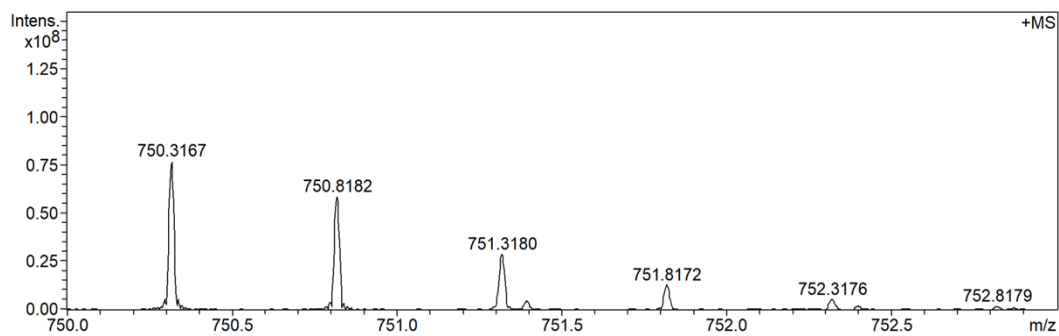

**Fig. S9** Mass spectrum of linear  $\alpha$ -conotoxin SI-3.

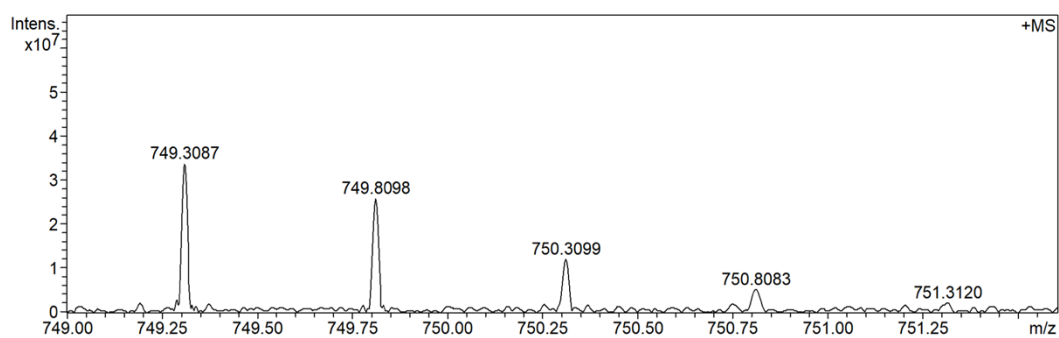

**Fig. S10** Mass spectrum of  $\alpha$ -conotoxin SI-3.

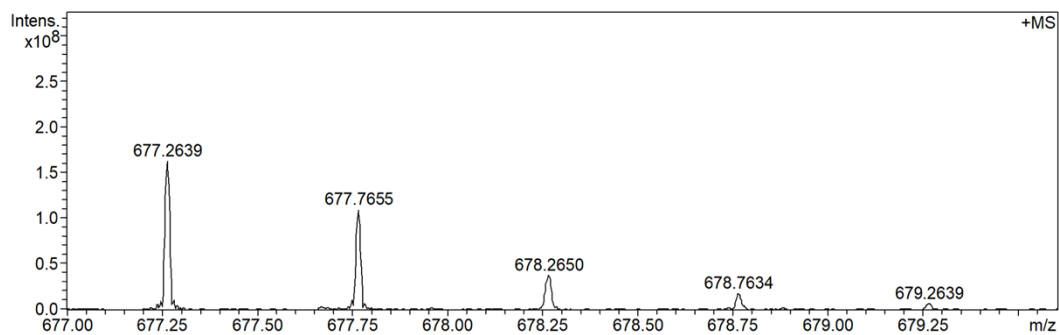

**Fig. S11** Mass spectrum of bead  $\alpha$ -conotoxin SI.



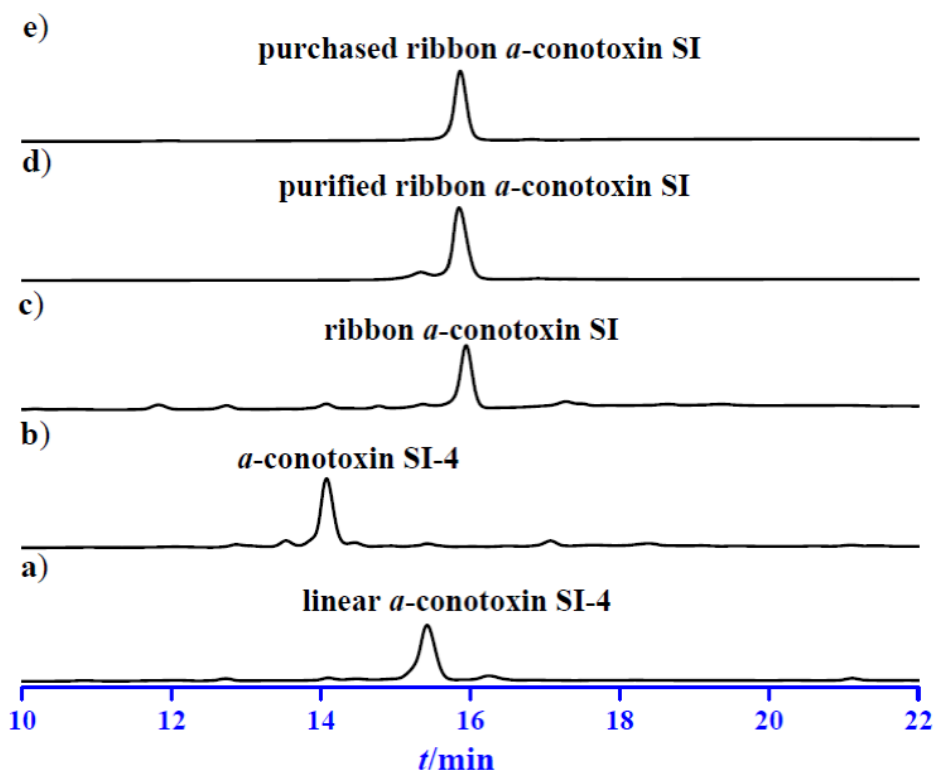

**Fig. S12** HPLC chromatograms of a) linear  $\alpha$ -conotoxin SI-4; b) the generated  $\alpha$ -conotoxin SI-4 from the reaction of linear  $\alpha$ -conotoxin SI-4 with BSA in pH 7.0 phosphate buffer; c) the generated ribbon  $\alpha$ -conotoxin SI from the reaction of  $\alpha$ -conotoxin SI-4 with BSA in 0.8 M TFA and 0.5 M HBr; d) the purified ribbon  $\alpha$ -conotoxin SI; e) the purchased ribbon  $\alpha$ -conotoxin SI.

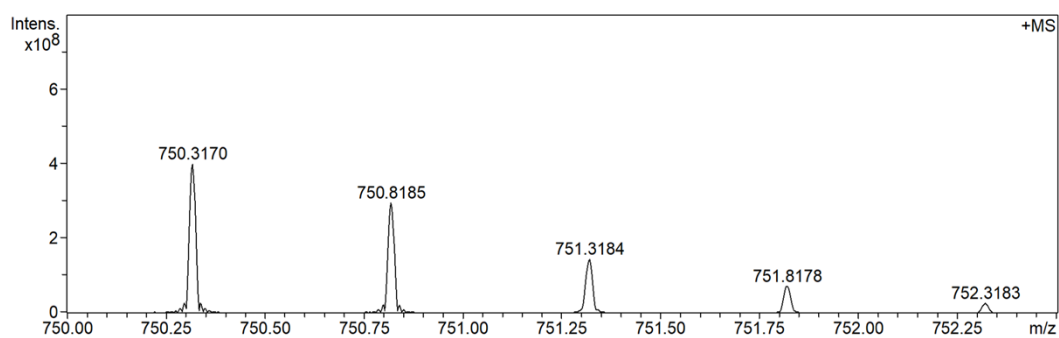

**Fig. S13** Mass spectrum of linear  $\alpha$ -conotoxin SI-4.

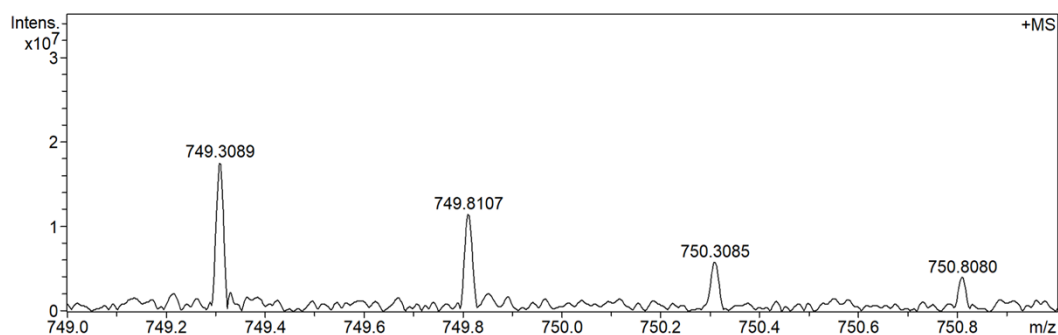

**Fig. S14** Mass spectrum of  $\alpha$ -conotoxin SI-4.

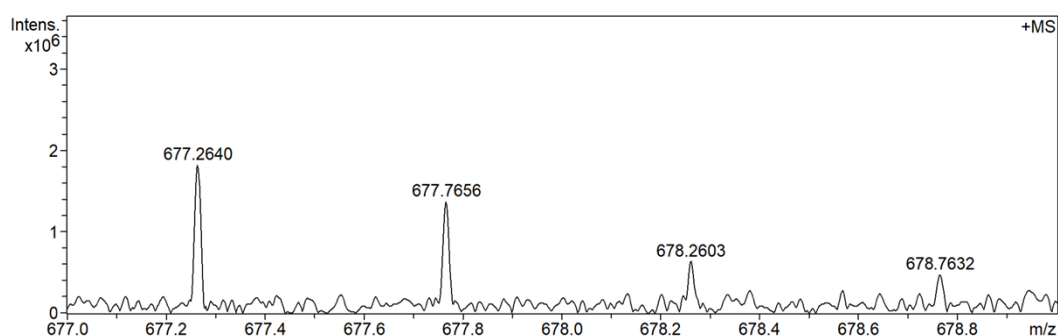

**Fig. S15** Mass spectrum of ribbon  $\alpha$ -conotoxin SI.

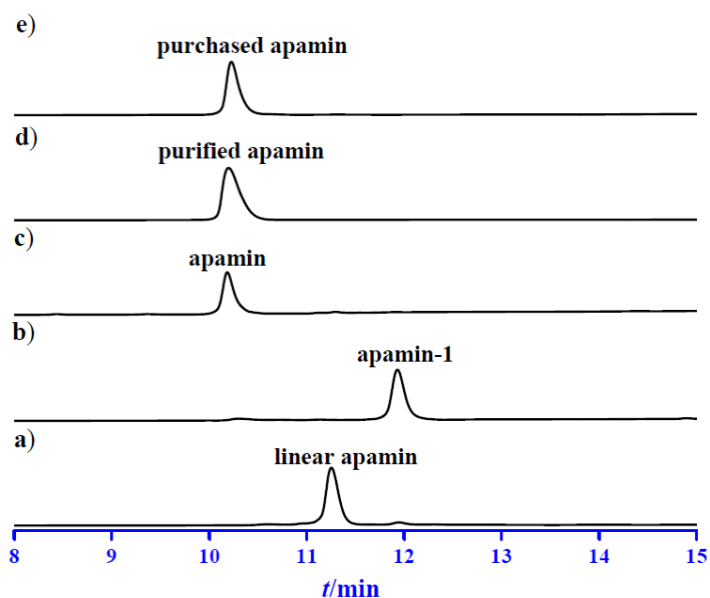

**Fig. S16** HPLC chromatograms of a) linear apamin; b) apamin-1 obtained was generated from the reaction between linear apamin reacted and BSA; c) apamin obtained was generated by reaction of apamin-1 with BSA; d) the purified apamin; e) the commercially available apamin.

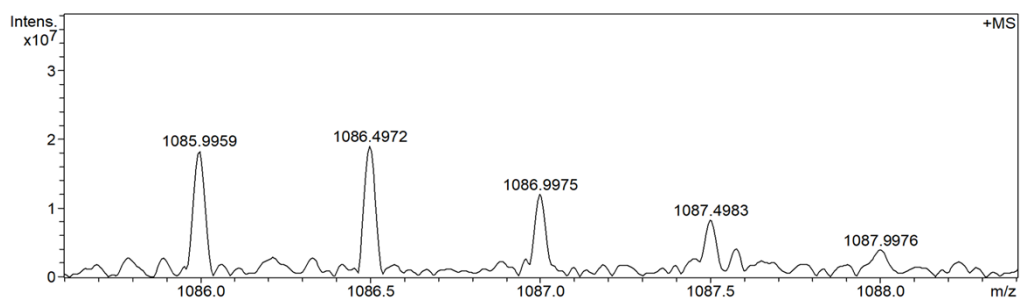

**Fig. S17** Mass spectrum of apamin-1.

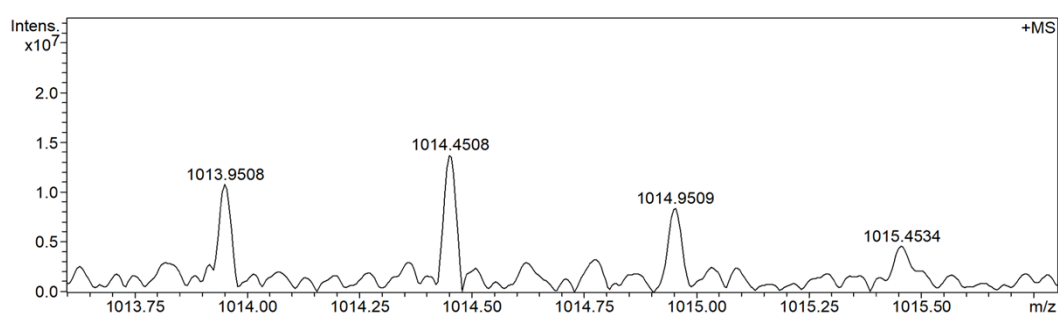

**Fig. S18** Mass spectrum of apamin.

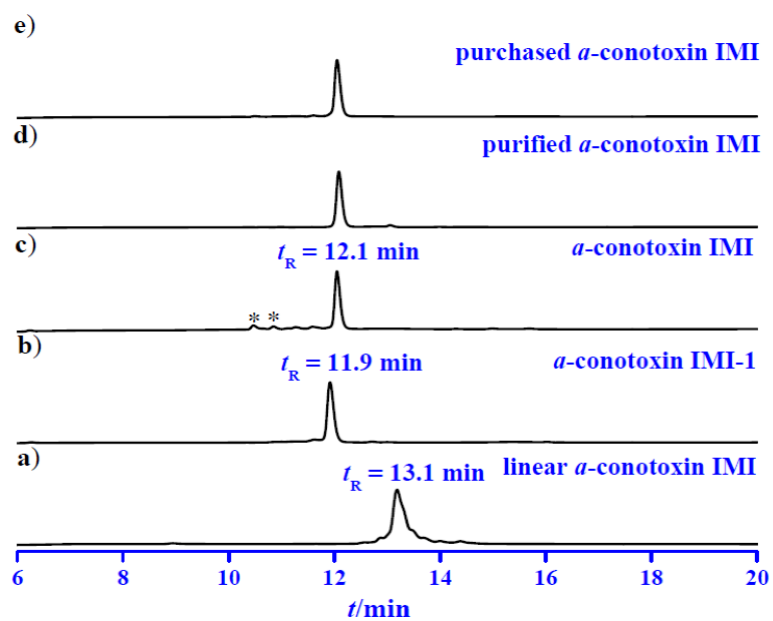

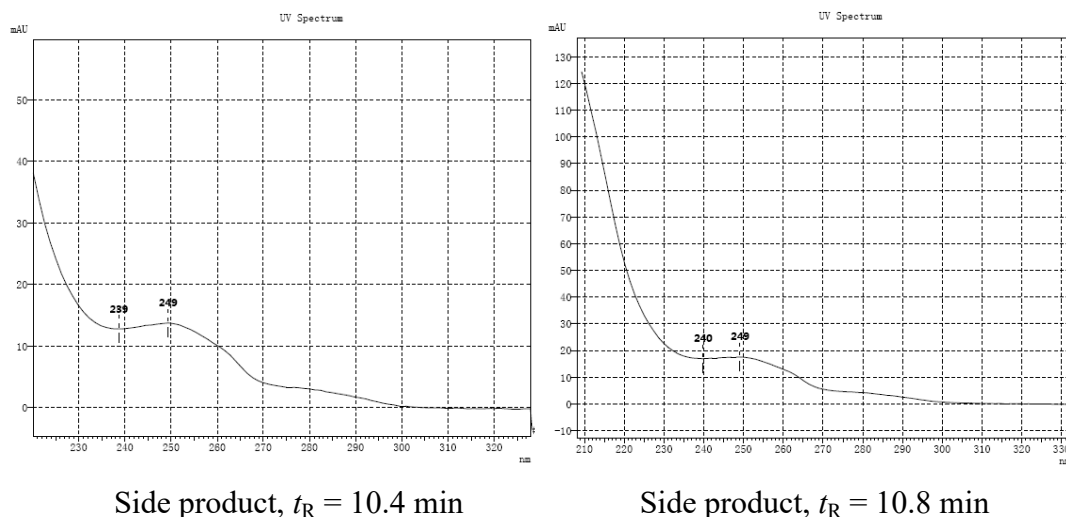

**Fig. S19** HPLC chromatograms of a) linear  $\alpha$ -conotoxin IMI; b) the generated  $\alpha$ -conotoxin IMI-1 from the reaction of linear  $\alpha$ -conotoxin IMI with BSA; c) the generated  $\alpha$ -conotoxin IMI from the reaction of  $\alpha$ -conotoxin IMI-1 with BSA; d) the purified  $\alpha$ -conotoxin IMI; e) the purchased  $\alpha$ -conotoxin IMI. The \* signs in the chromatograms indicate the side products generated from the oxidation of the tryptophan residue. The two side products with an absorption band around 250 nm are all  $\beta$ -oxindolylalanine characterized by UV-vis spectrometer <sup>1</sup>.

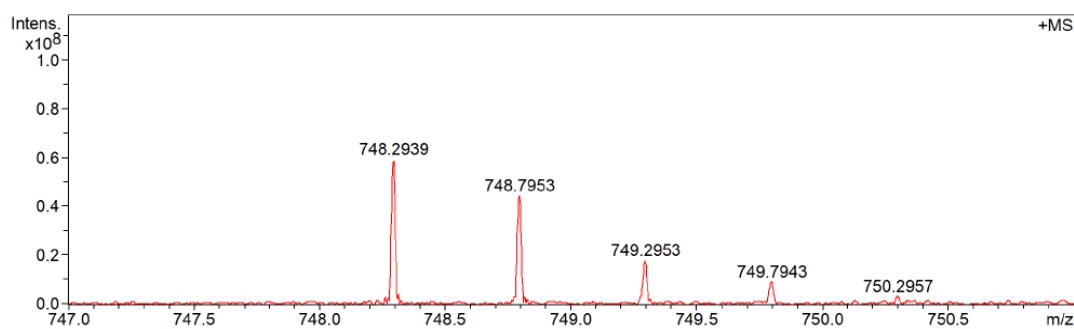

**Fig. S20** Mass spectrum of the generated  $\alpha$ -conotoxin IMI-1.

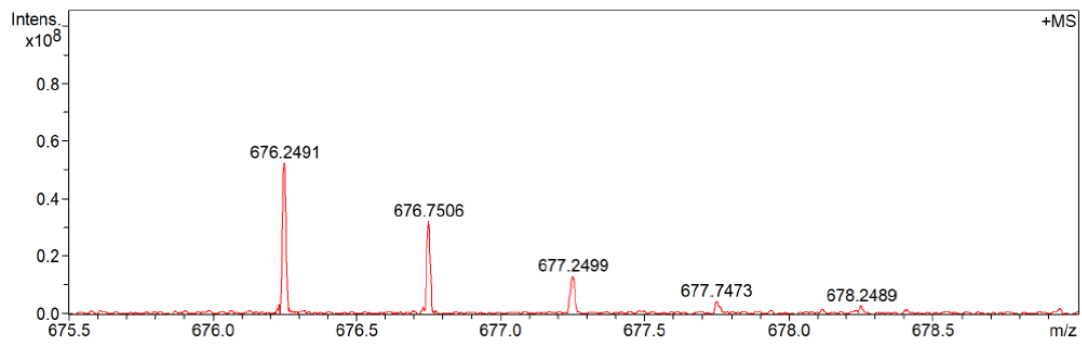

**Fig. S21** Mass spectrum of the generated  $\alpha$ -conotoxin IMI.

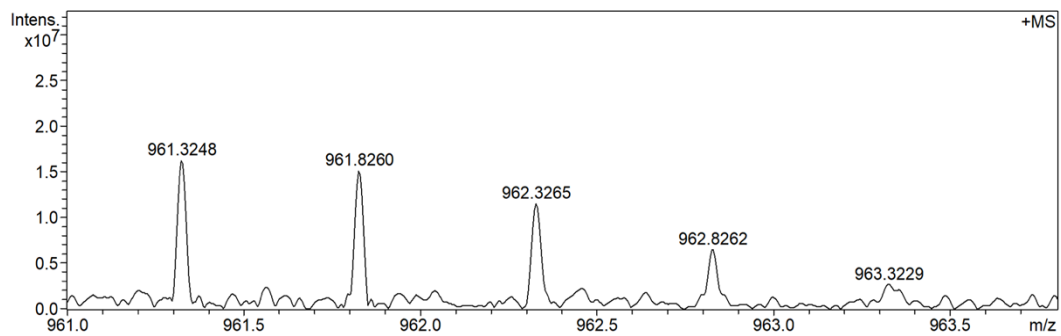

**Fig. S22** Mass spectrum of M-peptide-1.

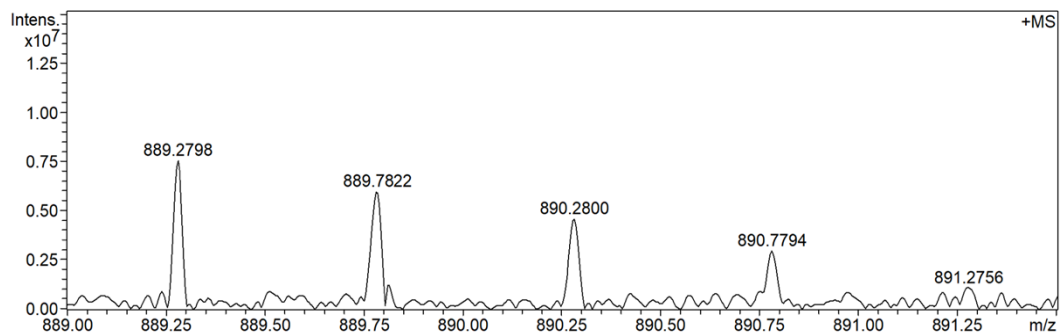

**Fig. S23** Mass spectrum of M-peptide.

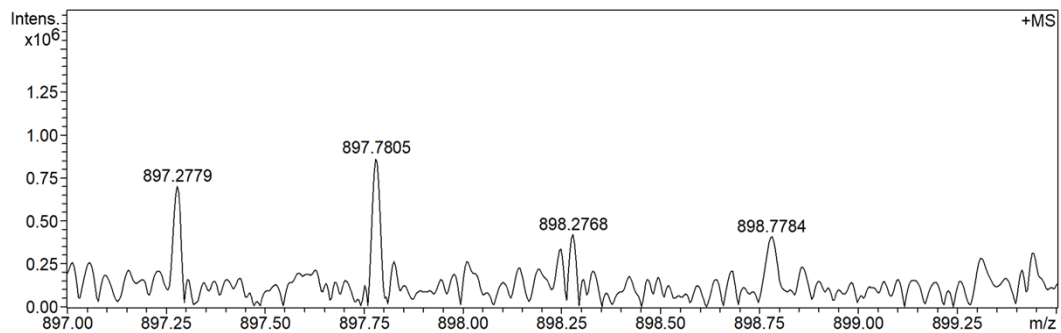

**Fig. S24** Mass spectrum of M(O)-peptide.

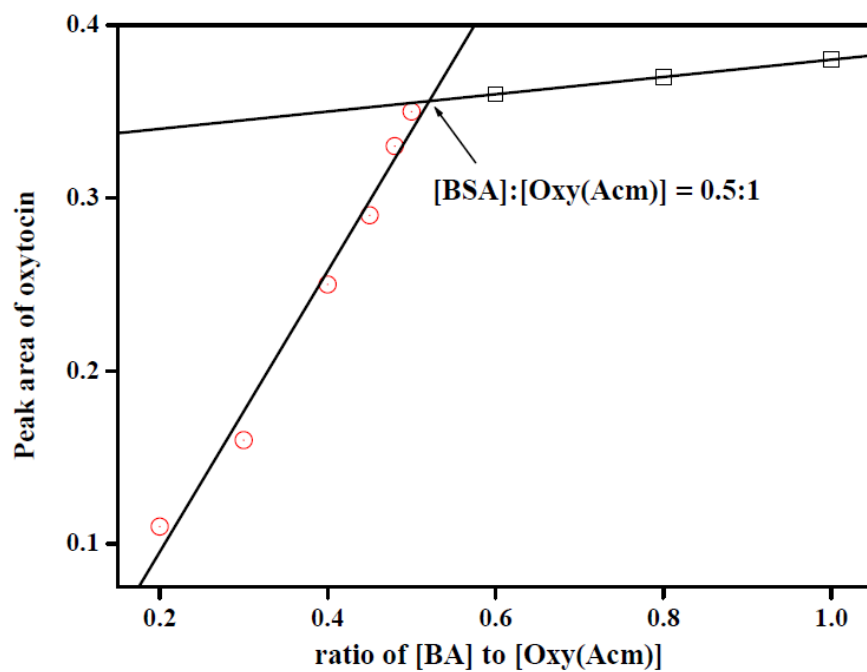

**Fig. S25** The stoichiometric ratio of the deprotection of two Acm groups to generate oxytocin by BSA.

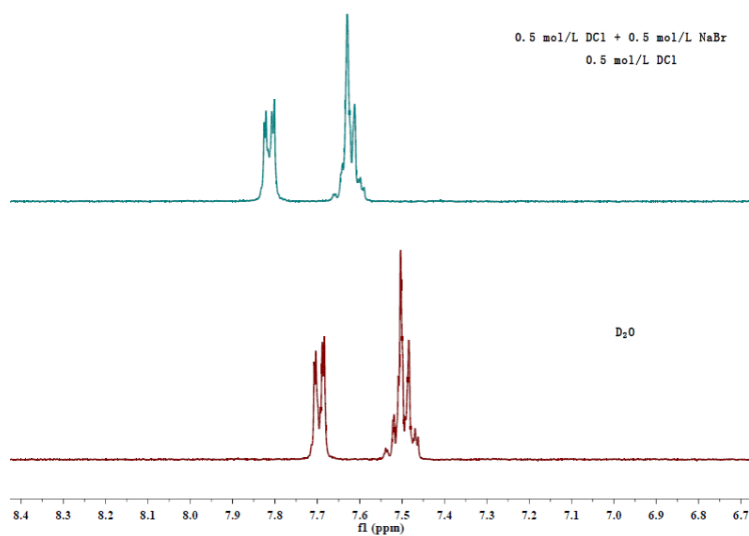

**Fig. S26** NMR spectra of BSA.

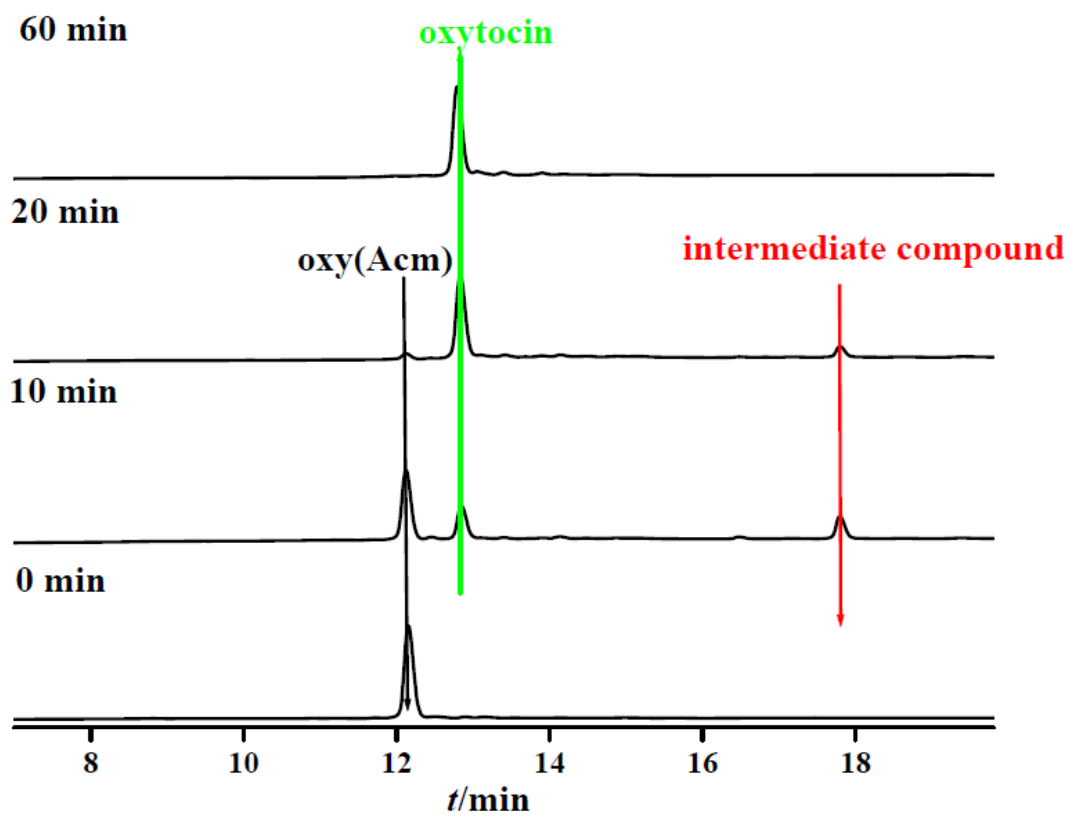

**Fig. S27** BSA (0.125 mM) reaction with oxy(Acm) (0.25 mM) in 0.5 M HBr.

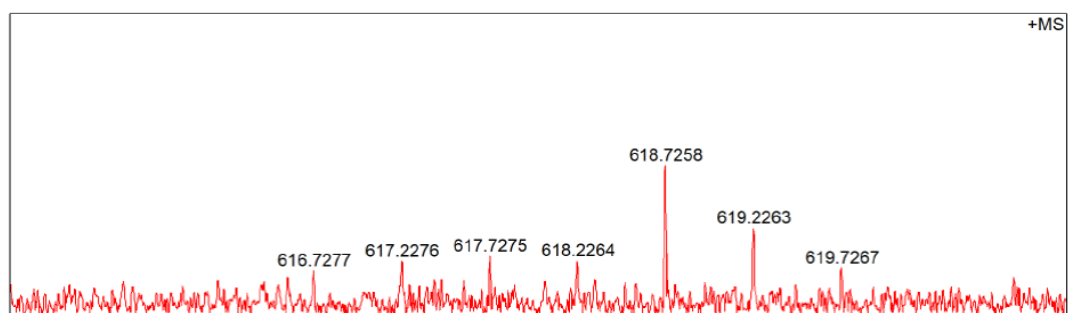

**Fig. S28** Mass spectrum of intermediate compound 6.

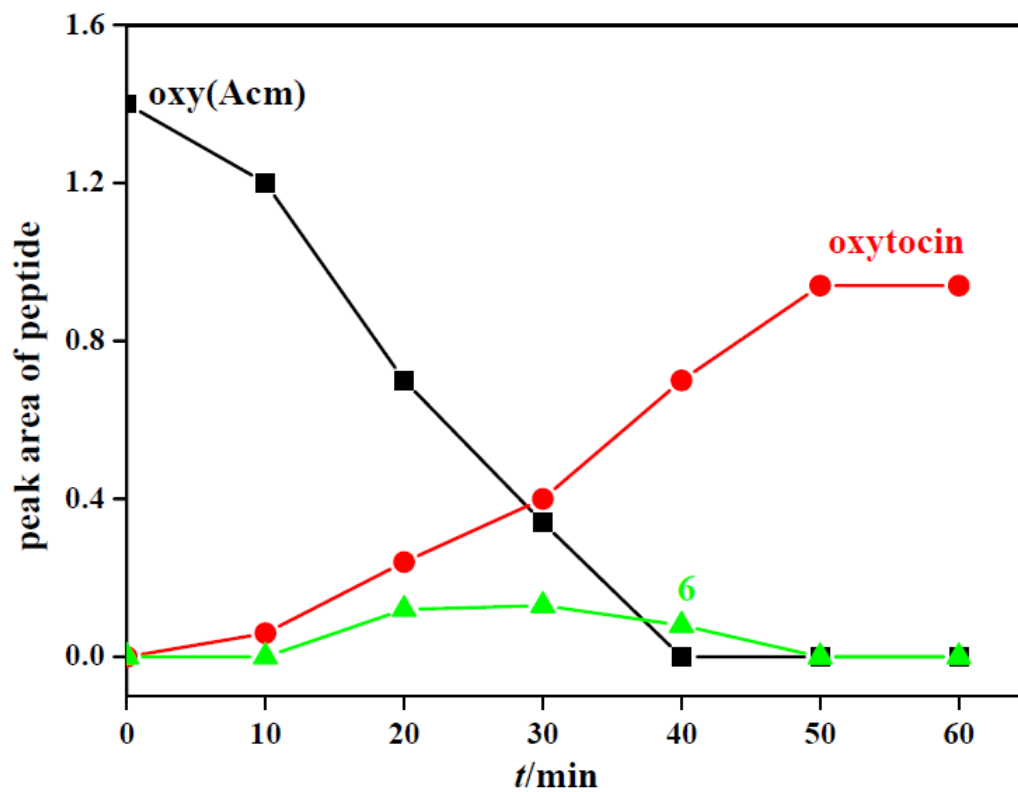

**Fig. S29** Kinetic curve of the reaction between BSA (1.0 mM) and oxy(Acm) (0.1 mM) in 0.2 M HBr solution at 25 °C.

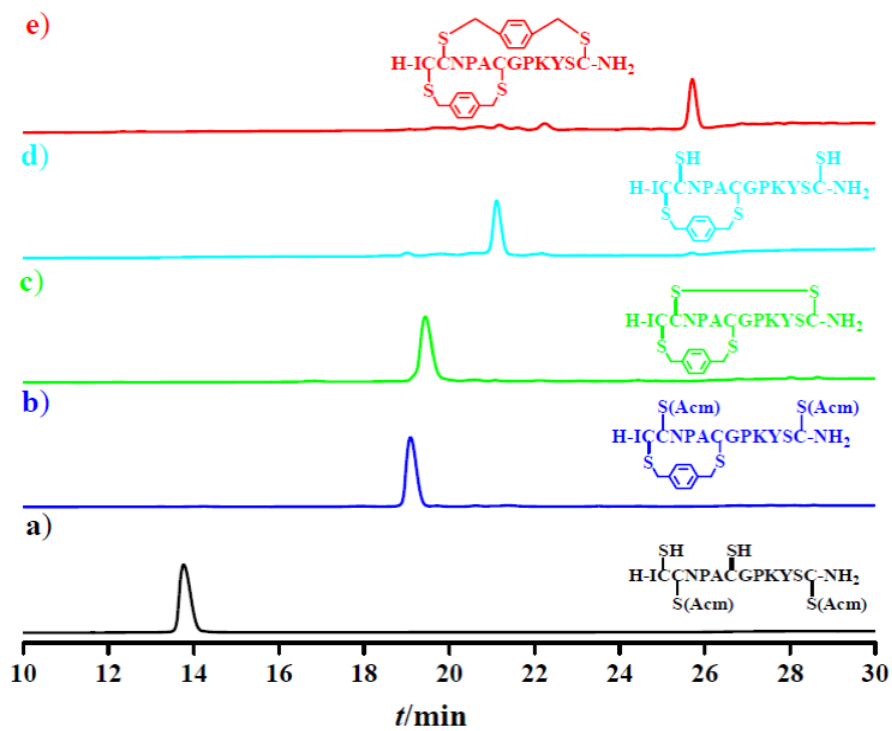

**Fig. S30** One-pot synthesis of XCBP-1.



XY-1\_230915151403 #7 RT: 0.11 AV: 1 NL: 1.26E5  
T: FTMS (1,1) + p ESI Full ms [150.00-2000.00]

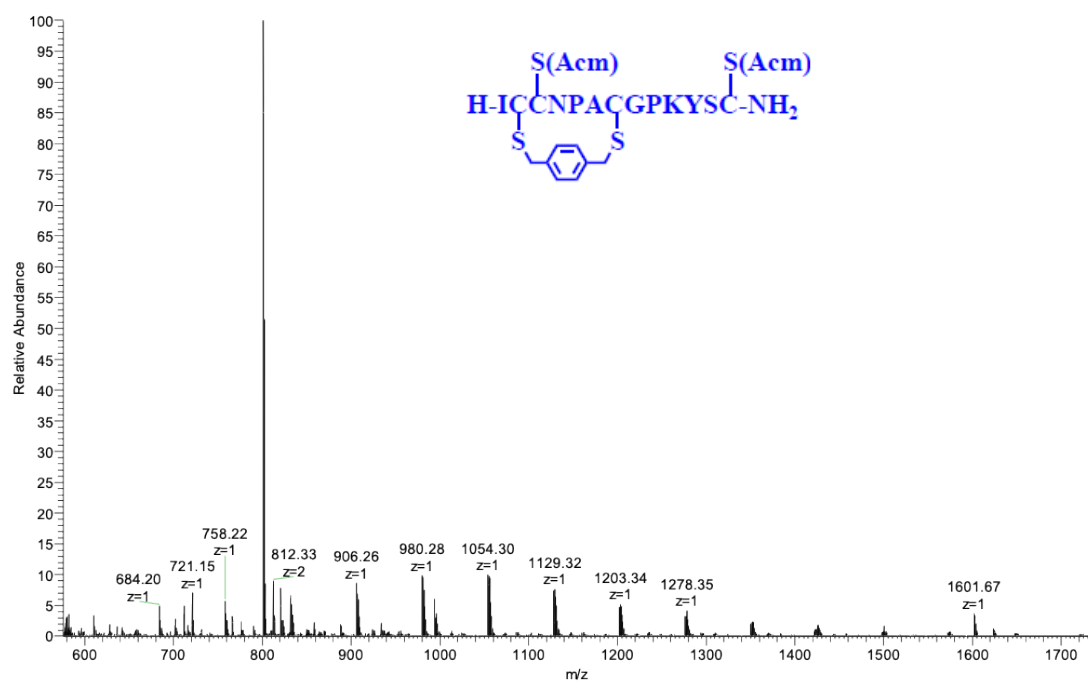

**Fig. S31** Mass spectrum of generated peptides as shown in Fig. S29b.

XY-2\_230915152349 #7 RT: 0.11 AV: 1 SB: 29 0.01-0.07, 0.62-1.02 NL: 2.50E3  
T: FTMS (1,1) + p ESI Full ms [150.00-2000.00]

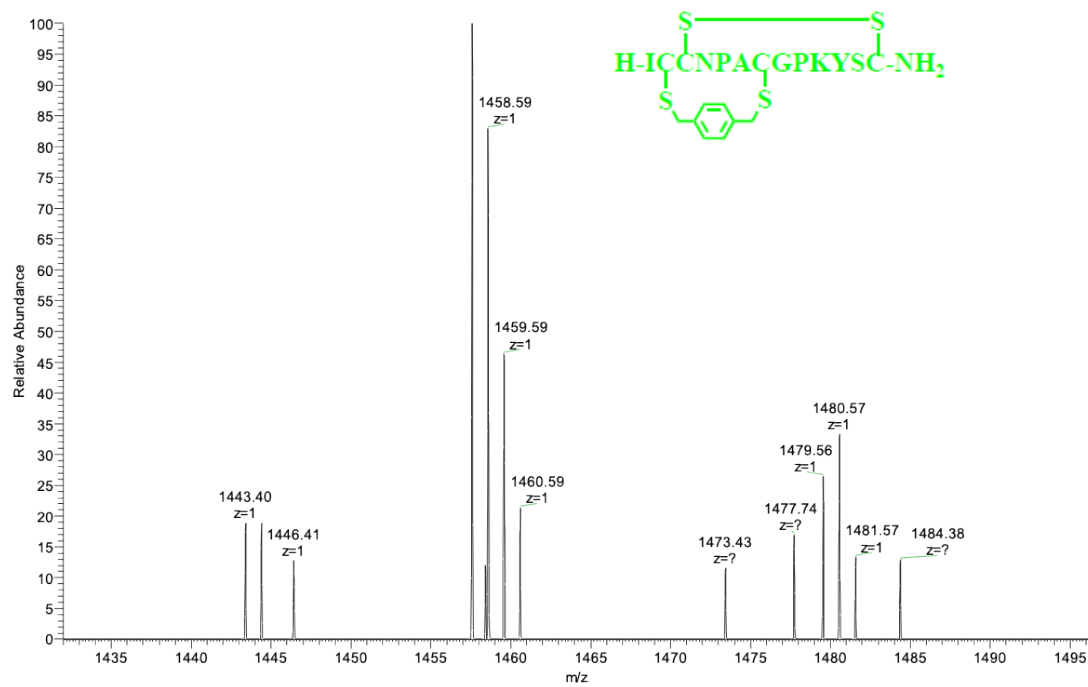

**Fig. S32** Mass spectrum of generated peptides as shown in Fig. S29c.

XXY-3\_230915153022 #7 RT: 0.11 AV: 1 NL: 1.18E4  
T: FTMS (1,1) + p ESI Full ms [150.00-2000.00]

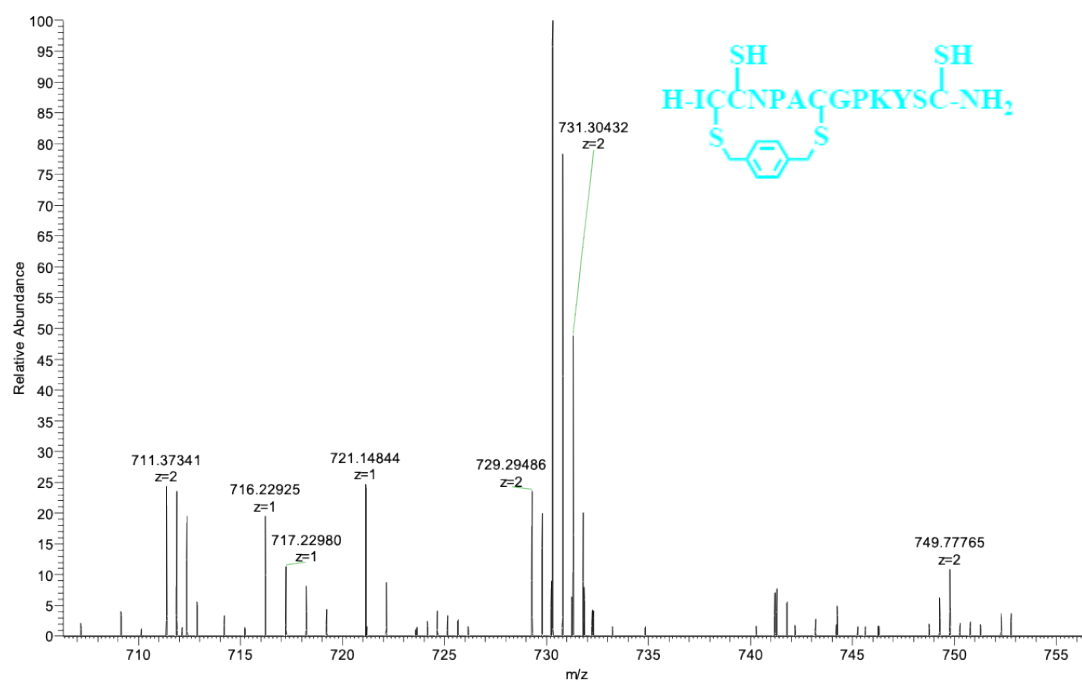

**Fig. S33** Mass spectrum of generated peptides as shown in Fig. S29d.

XXY-4\_230915153710 #7 RT: 0.11 AV: 1 NL: 7.57E3  
T: FTMS (1,1) + p ESI Full ms [150.00-2000.00]

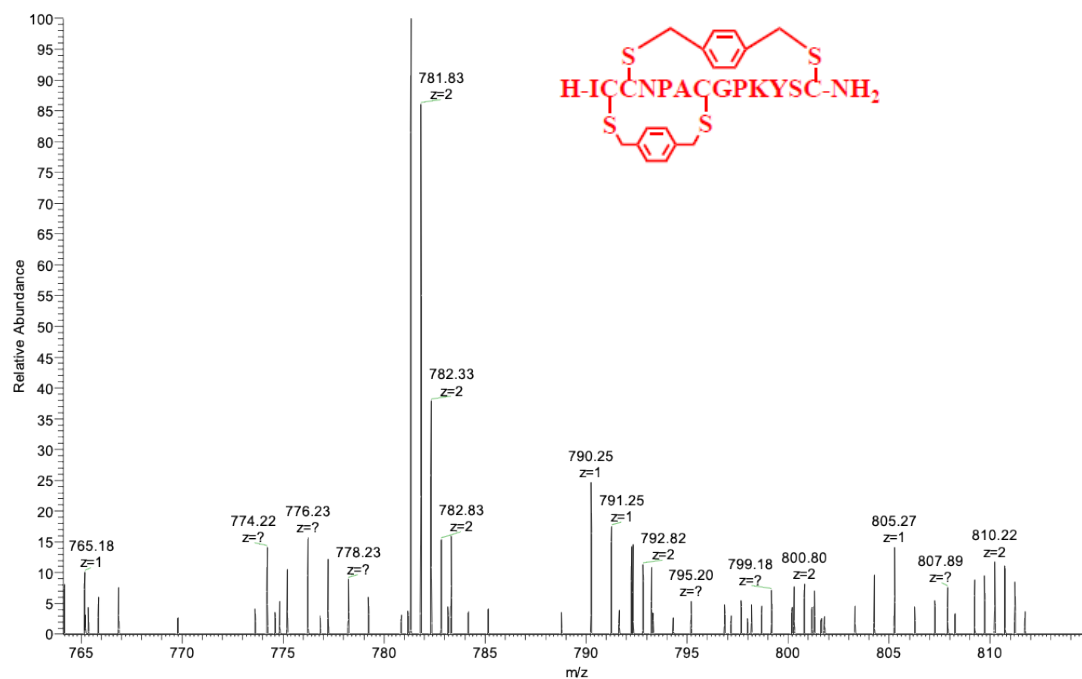

**Fig. S34** Mass spectrum of generated peptides as shown in Fig. S29e.

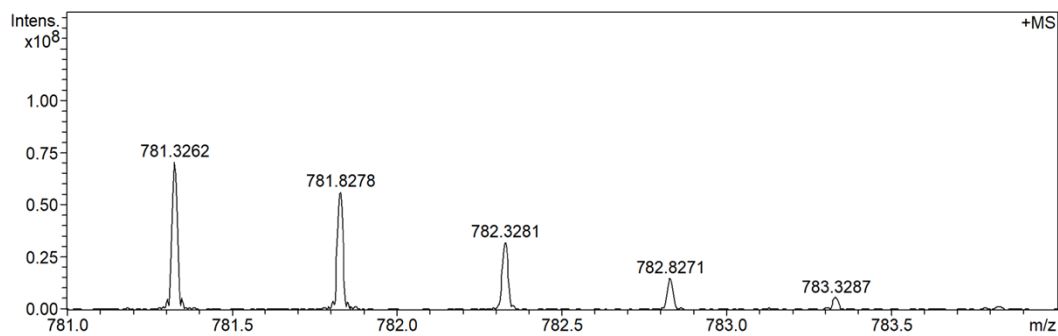

**Fig. S35** Mass spectrum of XCBP-1.

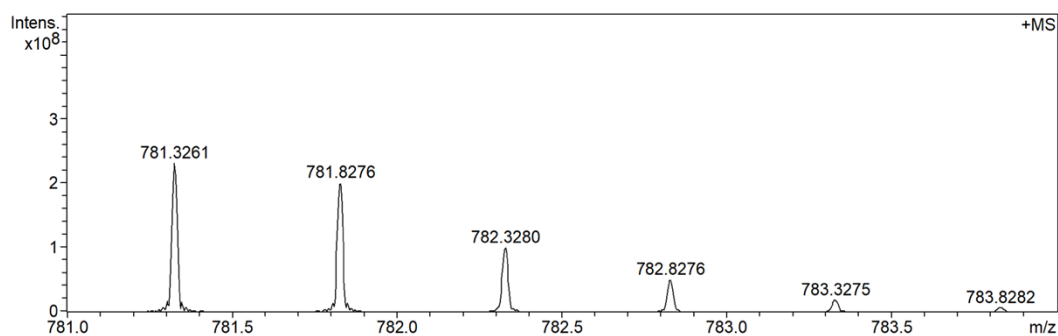

**Fig. S36** Mass spectrum of XCBP-2.

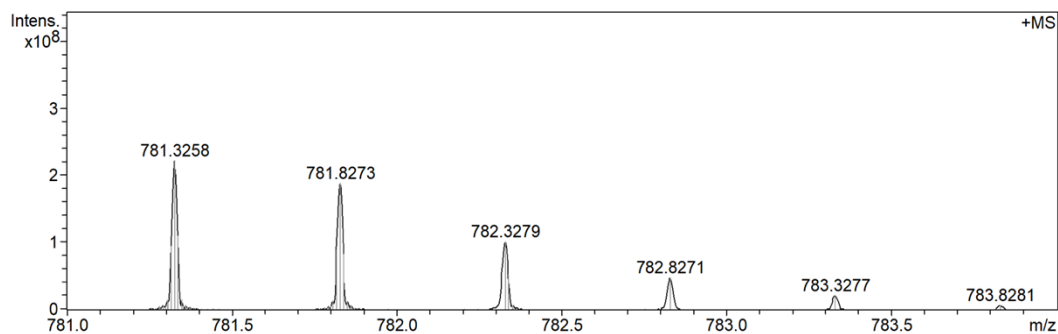

**Fig. S37** Mass spectrum of XCBP-3.

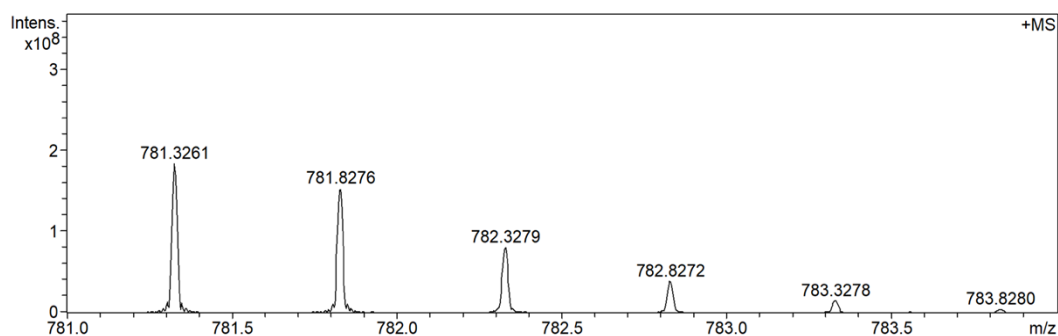

**Fig. S38** Mass spectrum of XCBP-4.

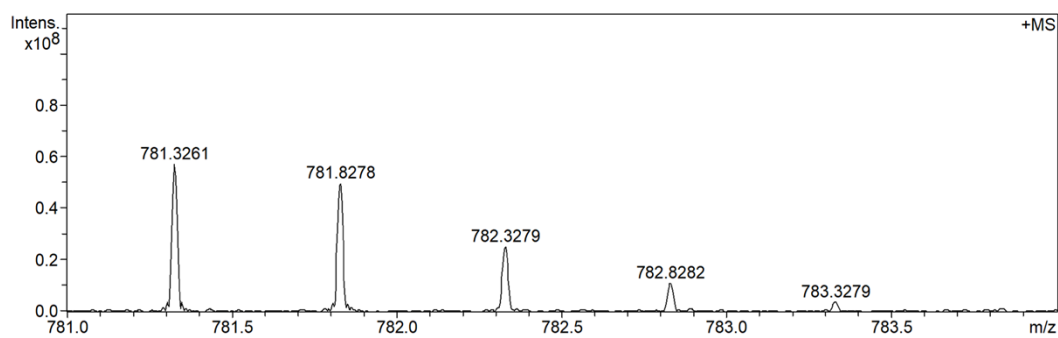

**Fig. S39** Mass spectrum of XCBP-5.

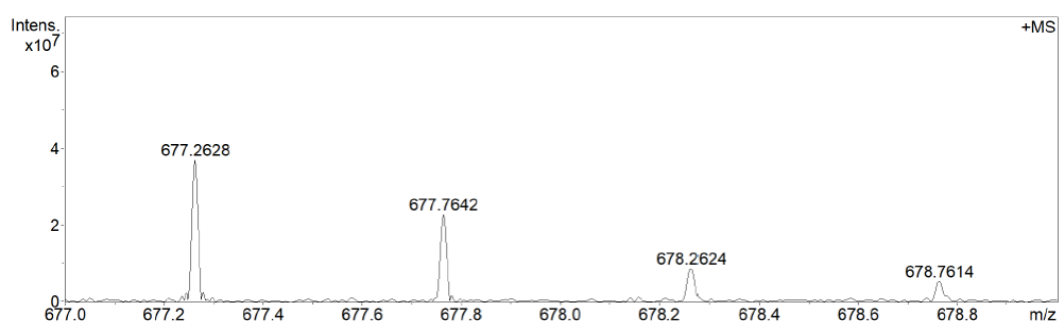

**Fig. S40** Mass spectrum of  $\alpha$ -conotoxin SI.

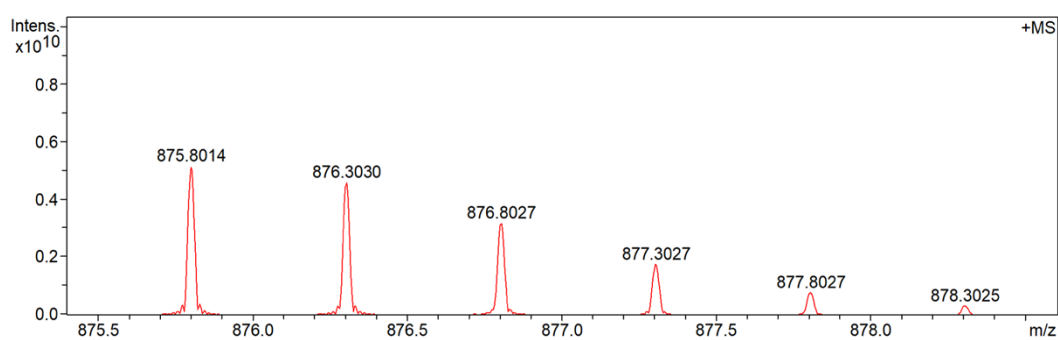

**Fig. S41** Mass spectrum of reduced conotoxin mr3e.

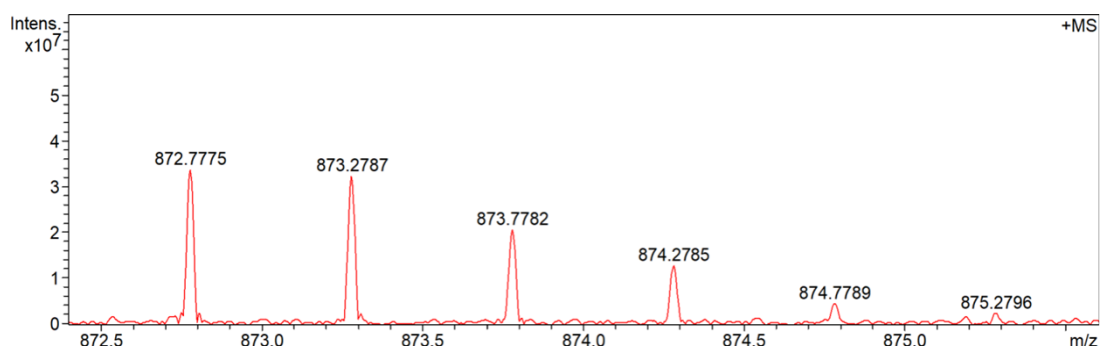

**Fig. S42** Mass spectrum of conotoxin mr3e.

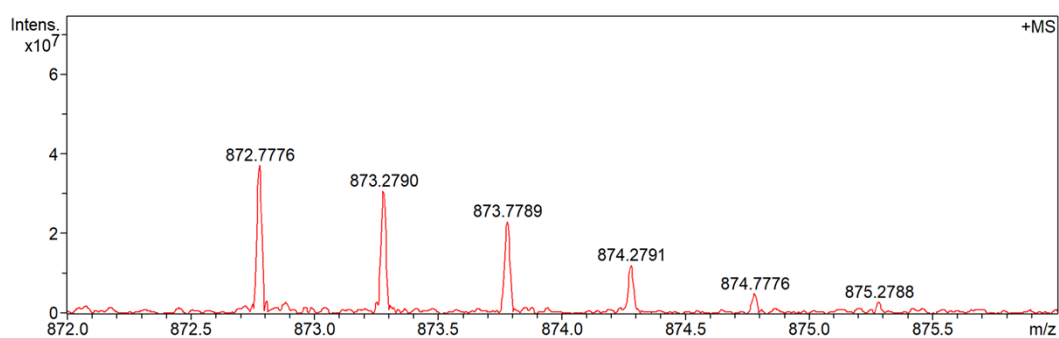

**Fig. S43** Mass spectrum of the isomer of conotoxin mr3e.

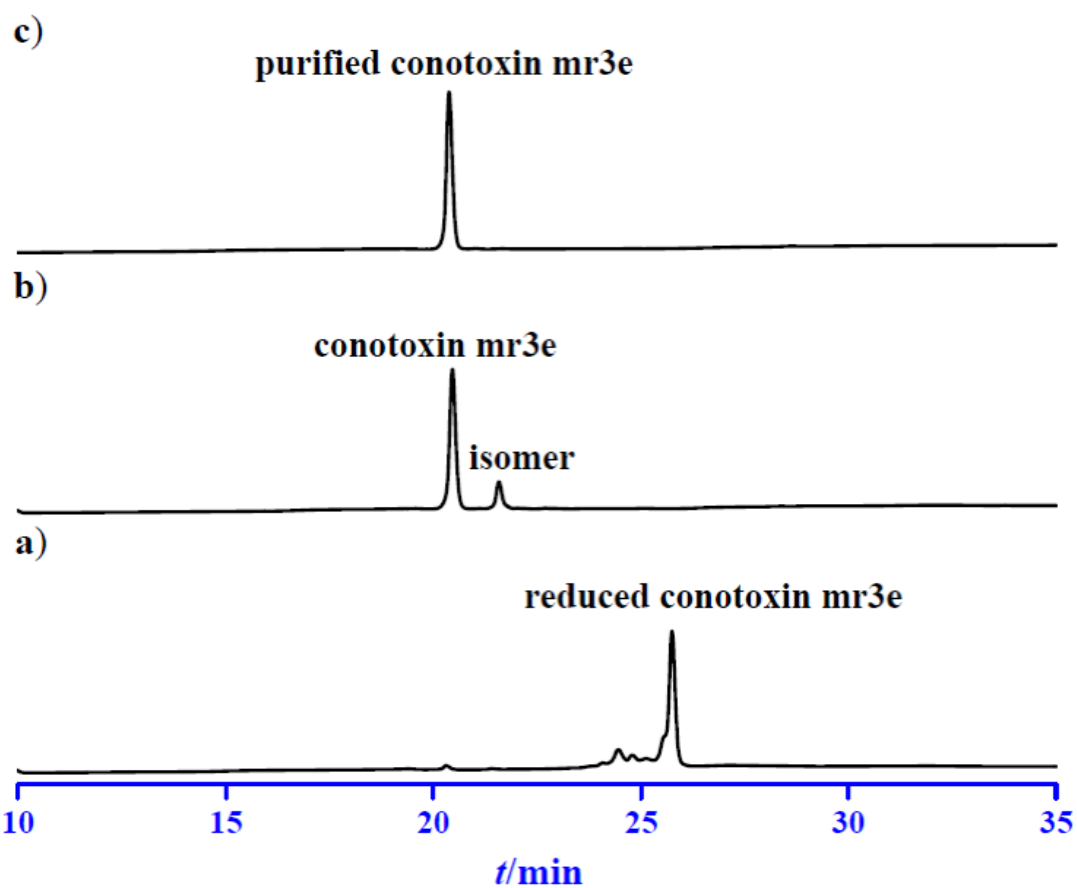

**Fig. S44** HPLC chromatograms of a) reduced conotoxin mr3e; b) reduced conotoxin mr3e (0.2 mM) reacted with GSH (2.0 mM)/GSSG (2.0 mM) for 3 h in pH 8.0 Tris buffer solution; c) the purified conotoxin mr3e.

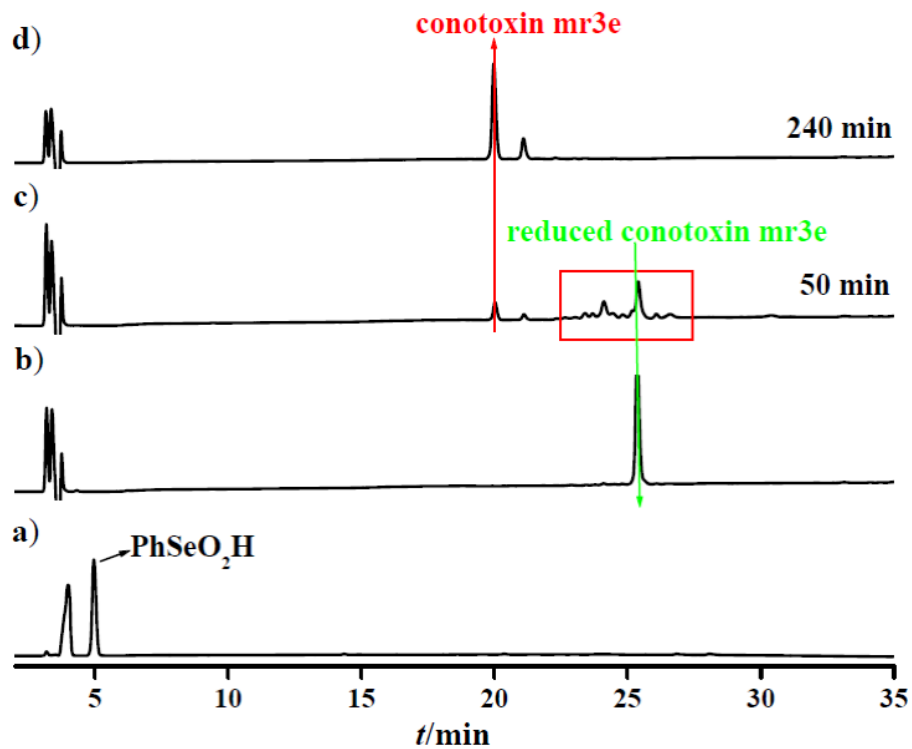

**Fig. S45** HPLC chromatograms of a)  $\text{PhSeO}_2\text{H}$ ; b) reduced conotoxin mr3e; c) reduced conotoxin mr3e (0.2 mM) reacted with BSA (0.04 mM) for 50 min in pH 7.0 phosphate buffer at 25 °C; d) reduced conotoxin mr3e (0.2 mM) reacted with BSA (0.04 mM) for 240 min in pH 7.0 phosphate buffer at 25 °C.

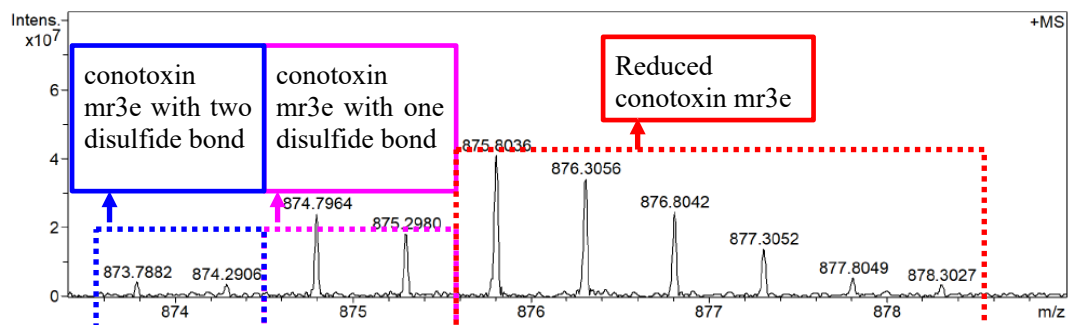

**Fig. S46** Mass spectrum of the peptides collected as shown in red box in Fig. S44.

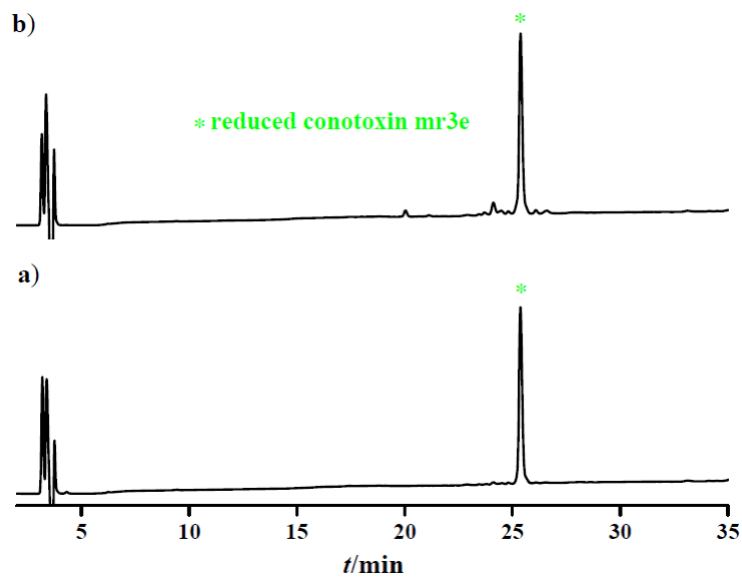

**Fig. S47** HPLC chromatograms of a) reduced conotoxin mr3e (0.2 mM) in pH 7.0 phosphate buffer at 25 °C; b) reduced conotoxin mr3e (0.2 mM) was aged for 5 h in pH 7.0 phosphate buffer at 25 °C.

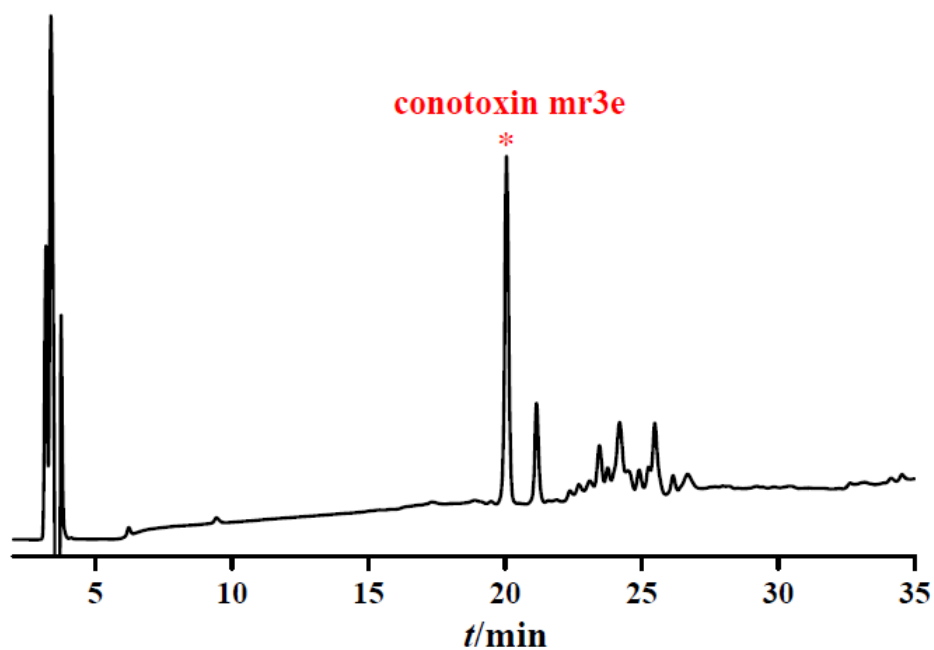

**Fig. 48** HPLC chromatogram of reduced conotoxin mr3e (0.2 mM, 1.6 mL) reacted with PhSeSePh (0.02 mg, 65  $\mu$ L) for 4 h in pH 7.0 phosphate buffer at 25 °C.

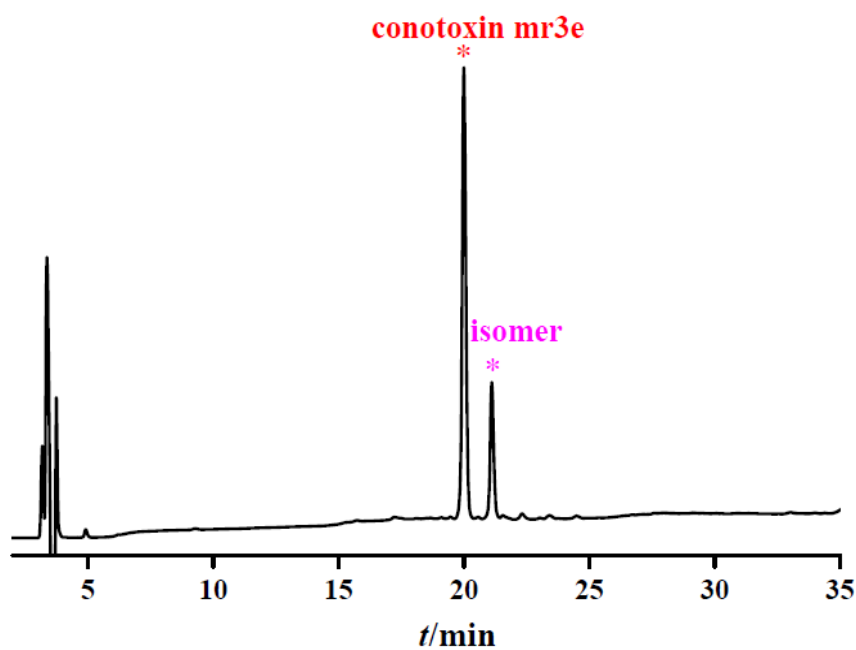

**Fig. S49** HPLC chromatogram of reduced conotoxin mr3e (0.2 mM, 2.6 mL) reacted with phenylselenenyl chloride (0.02 mg, 105  $\mu$ L ) for 4 h in pH 7.0 phosphate buffer at 25  $^{\circ}$ C.

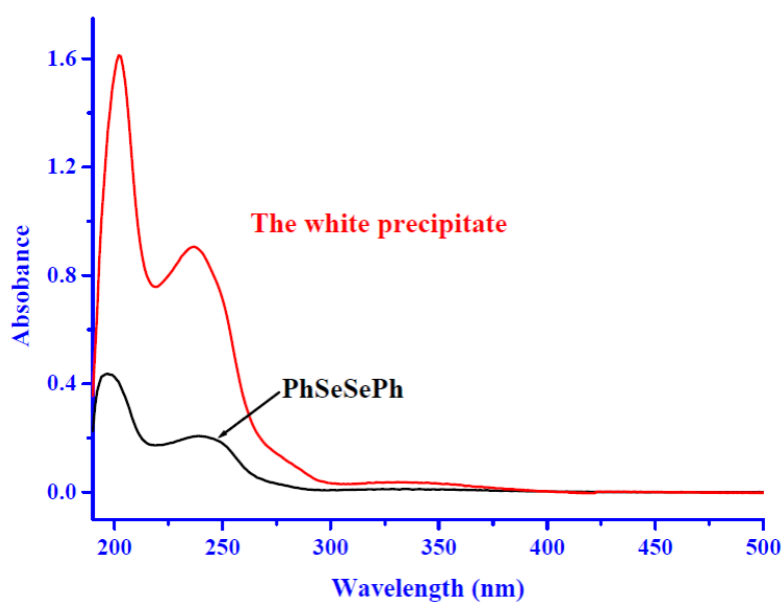

**Fig. S50** UV-vis spectra of the white precipitate generated from the reaction between the reduced conotoxin mr3e and phenylselenenyl chloride.



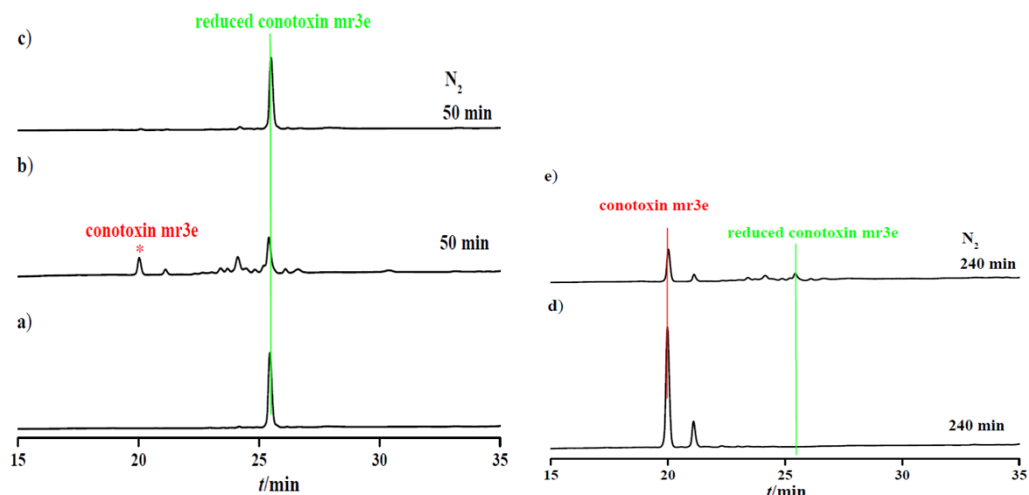

**Fig. S51** HPLC chromatograms of a) reduced conotoxin mr3e (0.2 mM); b) reduced conotoxin mr3e (0.2 mM) reacted with BSA (0.04 mM) for 50 min in pH 7.0 phosphate buffer at 25 °C; c) reduced conotoxin mr3e (0.2 mM); b) reduced conotoxin mr3e (0.2 mM) reacted with BSA (0.04 mM) for 50 min under N<sub>2</sub> in pH 7.0 phosphate buffer at 25 °C; d) reduced conotoxin mr3e (0.2 mM) reacted with BSA (0.04 mM) for 240 min in pH 7.0 phosphate buffer at 25 °C; e) reduced conotoxin mr3e (0.2 mM); b) reduced conotoxin mr3e (0.2 mM) reacted with BSA (0.04 mM) for 240 min under N<sub>2</sub> in pH 7.0 phosphate buffer at 25 °C.

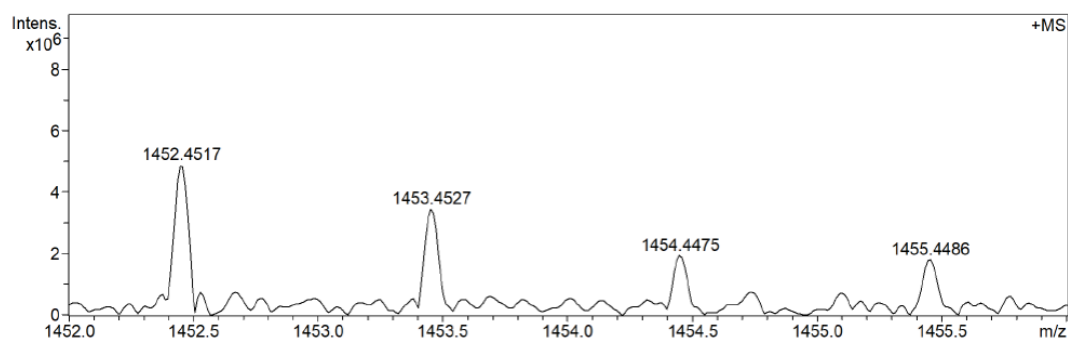

**Fig. S52** Mass spectrum of reduced enterotoxin STp.

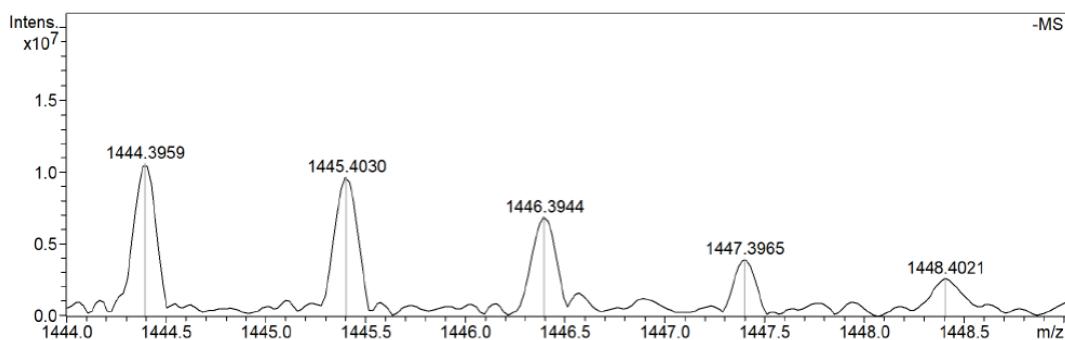

**Fig.S53** Mass spectrum of oxidized enterotoxin STp.

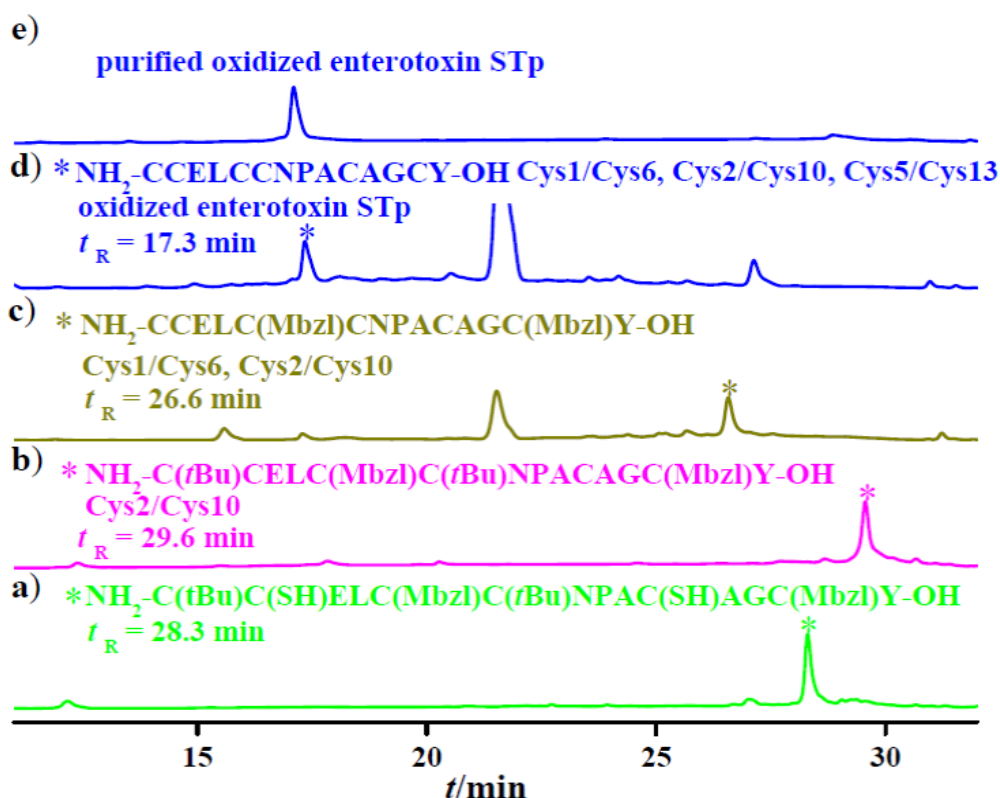

**Fig. S54** HPLC chromatograms of a) linear enterotoxin STp; b) linear enterotoxin STp reaction with DMSO to construct the first disulfide bond Cys2/Cys10; c) the one disulfide bond (Cys2/Cys10) containing enterotoxin STp reaction with DMSO in neat TFA to construct the second disulfide bond (Cys1/Cys6); d) the two disulfide bonds (Cys2/Cys10 and Cys1/Cys6) containing enterotoxin STp reaction with DMSO in neat TFA at 60 °C to construct the third disulfide bond (Cys5/Cys13); e) the purified oxidized enterotoxin STp with three disulfide bonds (Cys1/Cys6, Cys2/Cys10, and Cys5/Cys13); Peptides were purified on an LC-6AD semi-preparative high performance liquid chromatography system (HPLC) system (Shimadzu, Japan) and were analyzed on an LC-20AB HPLC system (Shimadzu, Japan), respectively. The

UV-vis detector was set at 215 nm. The flow rate was set as 10.0 mL/min with a 250 mm × 20 mm ODS-C18 column and 1.0 mL/min with 250 mm × 20 mm C8 column for semi-preparative HPLC and analytical HPLC, respectively. Two solvent systems consisting of 0.1% TFA in acetonitrile and 0.1% TFA in water (referred to as solvents A and B) were used for peptide elution with a suitable gradient. The elution protocol for analytical HPLC was set as follows: 10-23% B over 10 min and further to 48% B over 12 min, and then to 90% over 10 min.

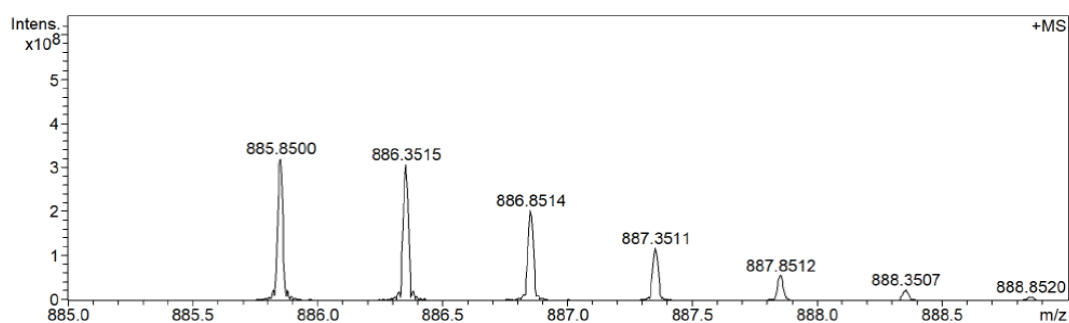

**Fig. S55** Mass spectrum of enterotoxin STp with one disulfide bond (NH<sub>2</sub>-C(*t*Bu)CELC(Mbz)C(*t*Bu)NPACAGC(Mbz)Y-OH, Cys2/Cys10, C<sub>79</sub>H<sub>115</sub>N<sub>15</sub>O<sub>19</sub>S<sub>6</sub>).

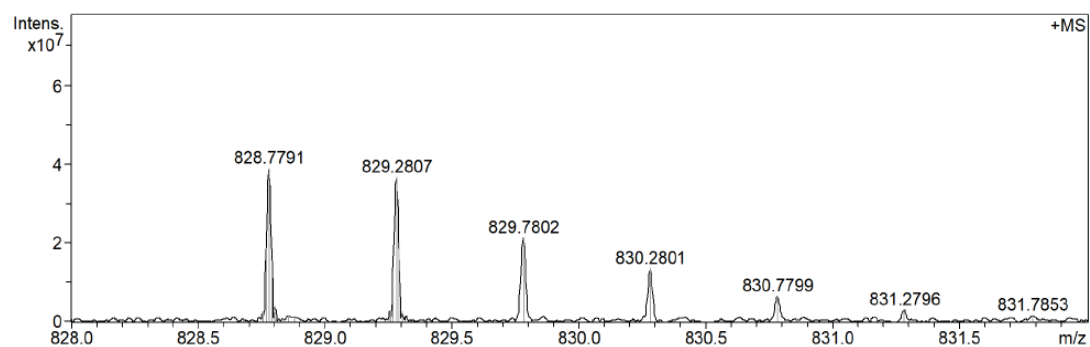

**Fig. S56** Mass spectrum of enterotoxin STp with two disulfide bonds (NH<sub>2</sub>-CCELC(Mbz)CNPACAGC(Mbz)Y-OH, Cys1/Cys6 and Cys2/Cys10, C<sub>71</sub>H<sub>97</sub>N<sub>15</sub>O<sub>19</sub>S<sub>6</sub>).

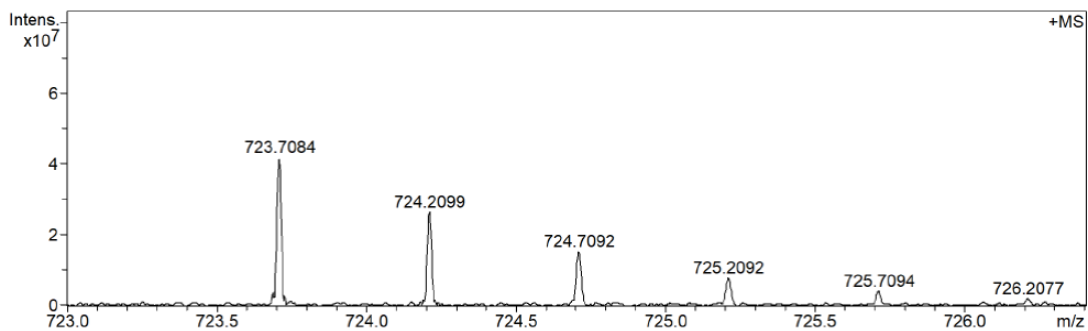

**Fig. S57** Mass spectrum of oxidized enterotoxin STp (NH<sub>2</sub>-CCELCCNPACAGCY-OH, Cys1/Cys6, Cys2/Cys10 and Cys5/Cys13).

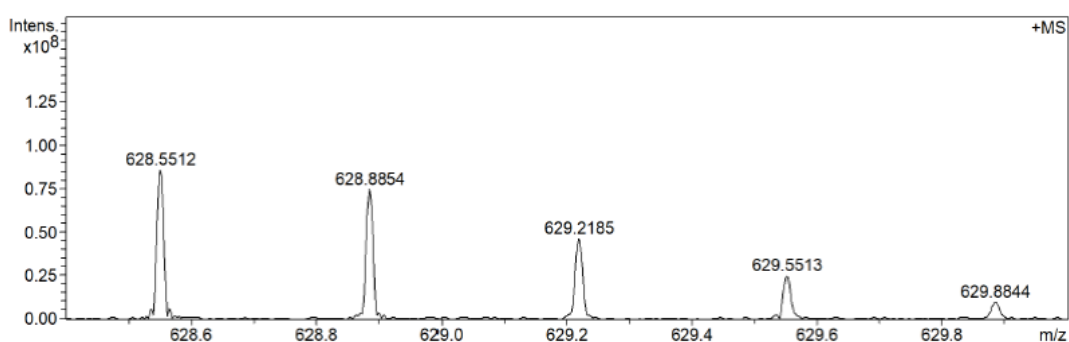

**Fig. S58** Mass spectrum of KIIIA-T.

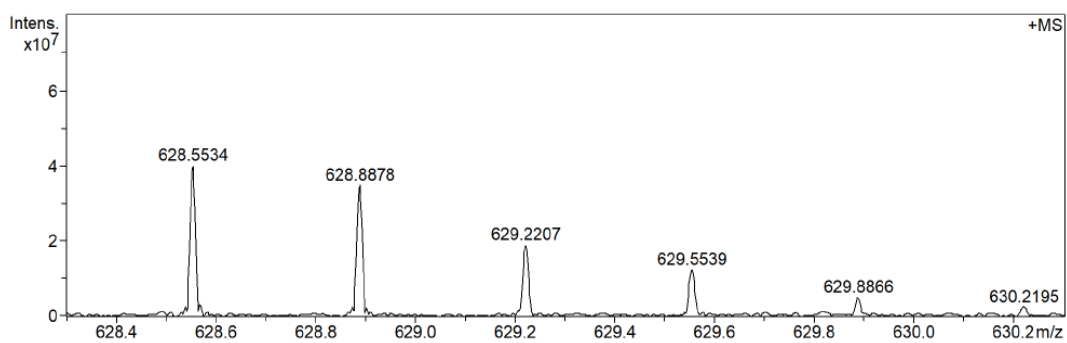

**Fig. S59** Mass spectrum of the isomer of KIIIA-T.

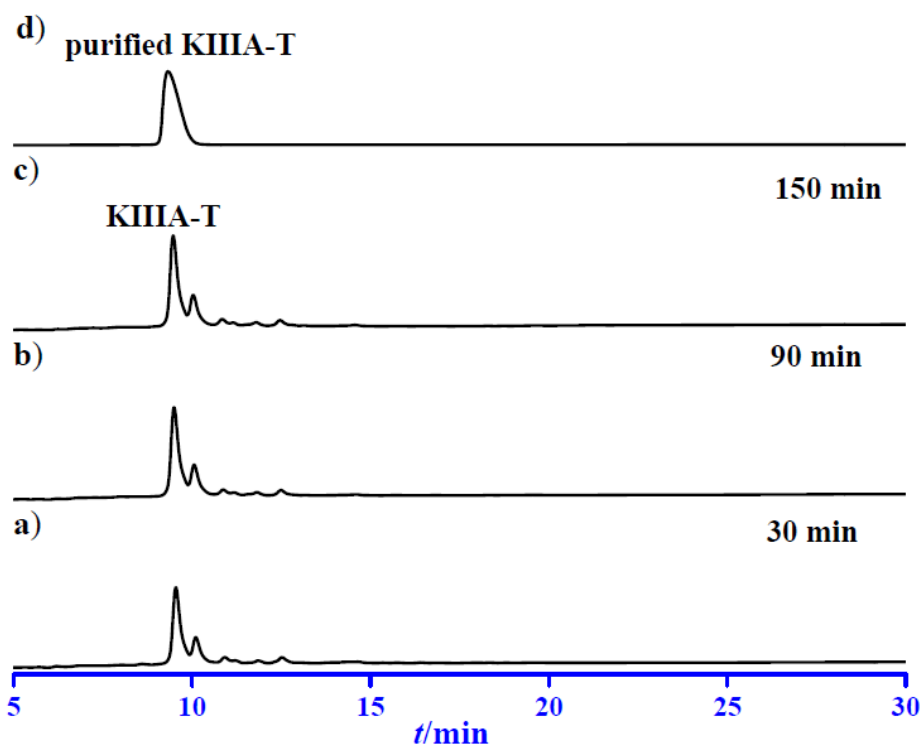

**Fig. S60** Reduced  $\mu$ -conotoxin KIIIA (20  $\mu$ M) was reacted with GSH (1.0 mM) and with GSSGH (1.0 mM) in pH 7.5 Tris buffer solution containing 1.0 mM of EDTA; the isolated yield of KIIIA-T is 42%.

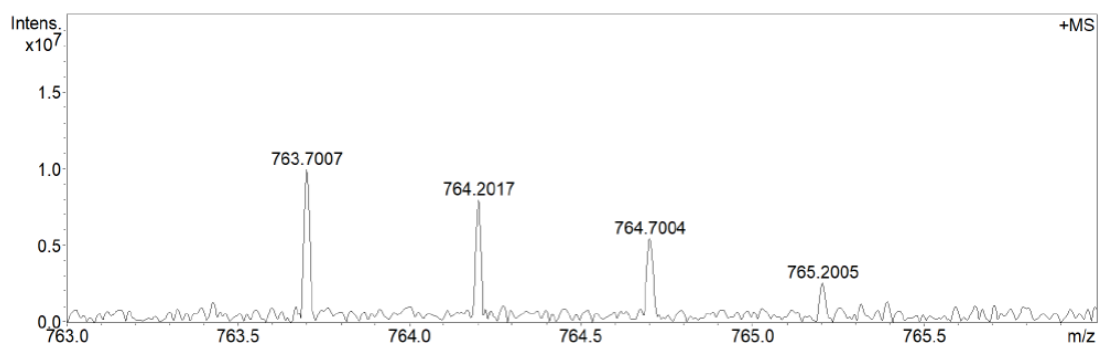

**Fig. S61** Mass spectrum of linaclootide.

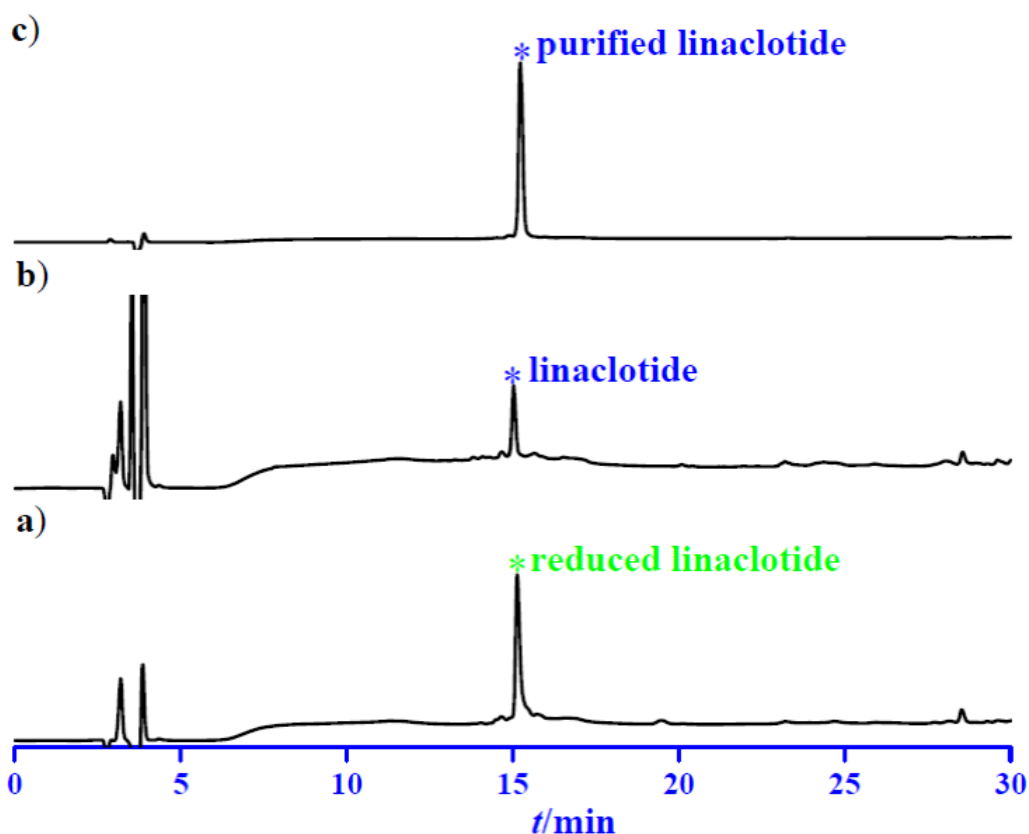

**Fig. S62** HPLC chromatograms of the linacotide generated from the oxidative folding reduced linacotide by GSSG/GSH.

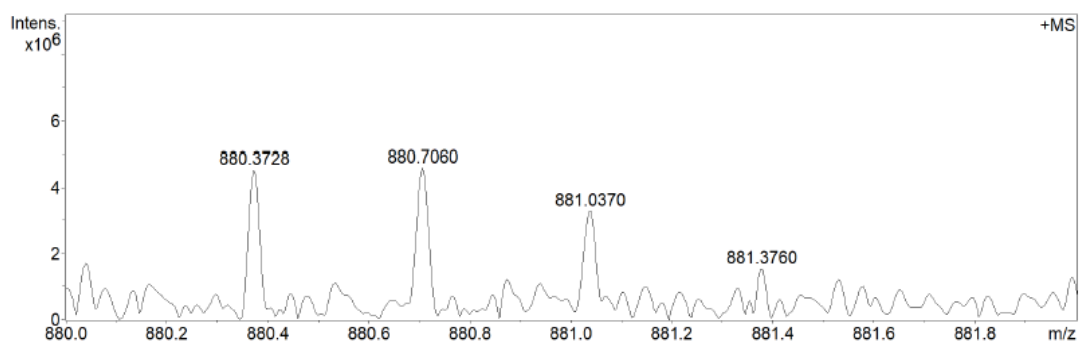

**Fig. S63** Mass spectrum of ziconotide.

## References

1. D. Ma, J. Sun, S. Shen, H. Chen, W. Xu, Y. Wang, C. Song, T. Shi and S. Huo, Deprotection of S-acetamidomethyl and 1,3-thiazolidine-4-carbonyl protecting groups from cysteine side chains in peptides by *trans*-[PtX<sub>2</sub>(CN)<sub>4</sub>]<sup>2-</sup>: one-pot regioselective synthesis of disulfide bonds, *J. Org. Chem.*, 2022, **87**, 1470-1476.
